# Supplementary material for: Benchmark of a functional-group database for distributed polarizability and dipole moment in biomolecules
Source: Royal Society of Chemistry journal article supplement (doi:10.1039/d2cp04052b), 2022-01-01
Supplement: d2cp04052b1.pdf [file d2cp04052b1.pdf]

# Benchmark of a functional-group database for distributed polarizability and dipole moment in biomolecules

Raphael F. Ligorio<sup>a</sup>, Jose R. Leal<sup>b</sup>, Anatoly Zuev<sup>a</sup>, Leonardo H. R. Dos Santos<sup>b</sup> and Anna Krawczuk<sup>a\*</sup>

<sup>a</sup>Institut für Anorganische Chemie, Universität Göttingen, Tammannstrasse 4, D-37077 Göttingen, Germany

<sup>b</sup>Departamento de Química, Universidade Federal de Minas Gerais, Av. Pres. Antônio Carlos 6627, 31270-901 Belo Horizonte MG, Brazil.

\*anna.krawczuk@uni-goettingen.de

## *Electronic Support Information*

### 1. Atomic coordinates

Table S1: glycine atomic coordinates. Values in atomic units.

|            | <b>x</b> | <b>y</b> | <b>z</b> |
|------------|----------|----------|----------|
| <b>N1</b>  | 0.6179   | 1.0431   | -1.0771  |
| <b>H2</b>  | 2.1675   | 1.4400   | 0.1020   |
| <b>H3</b>  | -0.0113  | 2.7439   | -1.8765  |
| <b>H4</b>  | 1.2699   | -0.1247  | -2.5247  |
| <b>C5</b>  | -1.4003  | -0.1361  | 0.4857   |
| <b>H6</b>  | -0.5745  | -1.7726  | 1.3814   |
| <b>H7</b>  | -2.9650  | -0.5953  | -0.7427  |
| <b>C8</b>  | -2.3924  | 1.6233   | 2.5625   |
| <b>O9</b>  | -1.7518  | 3.9117   | 2.6097   |
| <b>O10</b> | -3.8172  | 0.7068   | 4.2292   |

Table S2: alanine atomic coordinates. Values in atomic units.

|            | <b>x</b> | <b>y</b> | <b>z</b> |
|------------|----------|----------|----------|
| <b>N1</b>  | -0.8220  | -0.2740  | -0.0869  |
| <b>H2</b>  | -1.5741  | -1.9464  | -0.7578  |
| <b>H3</b>  | -1.4872  | 1.3134   | -1.0110  |
| <b>H4</b>  | -1.1622  | -0.1020  | 1.8822   |
| <b>C5</b>  | 1.9842   | -0.2967  | -0.0416  |
| <b>H6</b>  | 2.6683   | -2.0900  | -0.7408  |
| <b>C7</b>  | 2.9801   | 1.9351   | -1.6384  |
| <b>H8</b>  | 2.3244   | 3.7738   | -0.8636  |
| <b>H9</b>  | 2.3981   | 1.7745   | -3.6453  |
| <b>H10</b> | 5.0834   | 1.9445   | -1.5704  |

|            |        |         |        |
|------------|--------|---------|--------|
| <b>C11</b> | 2.8138 | -0.0661 | 2.7439 |
| <b>O12</b> | 1.1017 | 0.1247  | 4.4012 |
| <b>O13</b> | 5.1306 | -0.1191 | 3.2088 |

Table S3: aspartic acid atomic coordinates. Values in atomic units.

|            | <b>x</b> | <b>y</b> | <b>z</b> |
|------------|----------|----------|----------|
| <b>N1</b>  | -1.1225  | -0.2268  | -0.1247  |
| <b>H2</b>  | -1.4853  | -0.7143  | 1.7858   |
| <b>H3</b>  | -1.9011  | -1.5609  | -1.3209  |
| <b>H4</b>  | -1.7858  | 1.5817   | -0.4554  |
| <b>C5</b>  | 1.6989   | -0.3024  | -0.0926  |
| <b>H6</b>  | 2.3092   | -1.9086  | -1.2038  |
| <b>C7</b>  | 2.7987   | 2.2393   | -1.0658  |
| <b>H8</b>  | 2.9310   | 3.6717   | 0.4573   |
| <b>H9</b>  | 1.6157   | 3.0255   | -2.6154  |
| <b>C10</b> | 5.4065   | 1.8652   | -2.2412  |
| <b>O11</b> | 5.8317   | 2.2242   | -4.4654  |
| <b>O12</b> | 7.2320   | 1.0582   | -0.5934  |
| <b>H13</b> | 6.5479   | 0.5046   | 1.0375   |
| <b>C14</b> | 2.4831   | -0.7786  | 2.6834   |
| <b>O15</b> | 0.7616   | -1.1074  | 4.2972   |
| <b>O16</b> | 4.7980   | -0.7710  | 3.1766   |

Table S4: glutamic acid atomic coordinates. Values in atomic units.

|            | <b>x</b> | <b>y</b> | <b>z</b> |
|------------|----------|----------|----------|
| <b>N1</b>  | -1.5552  | -0.7011  | 0.2438   |
| <b>H2</b>  | -1.8330  | -0.7049  | 2.2318   |
| <b>H3</b>  | -2.3376  | -2.3055  | -0.5442  |
| <b>H4</b>  | -2.2526  | 0.9638   | -0.5083  |
| <b>C5</b>  | 1.2642   | -0.7370  | 0.2041   |
| <b>H6</b>  | 1.9048   | -2.4604  | -0.6860  |
| <b>C7</b>  | 2.2488   | 1.6535   | -1.1962  |
| <b>H8</b>  | 2.0409   | 3.3373   | 0.0529   |
| <b>H9</b>  | 1.0771   | 1.9804   | -2.9177  |
| <b>C10</b> | 5.0323   | 1.4249   | -2.0919  |
| <b>H11</b> | 5.2742   | -0.2381  | -3.3429  |
| <b>H12</b> | 6.2928   | 1.1905   | -0.4271  |
| <b>C13</b> | 5.8770   | 3.7757   | -3.5338  |
| <b>O14</b> | 4.5297   | 5.5104   | -4.2160  |
| <b>O15</b> | 8.4093   | 3.7795   | -4.0931  |
| <b>H16</b> | 8.7797   | 5.3177   | -4.9643  |
| <b>C17</b> | 2.1184   | -0.7786  | 2.9971   |

|            |        |         |        |
|------------|--------|---------|--------|
| <b>O18</b> | 0.4309 | -0.6954 | 4.6884 |
| <b>O19</b> | 4.4371 | -0.9392 | 3.4393 |

Table S5: histidine atomic coordinates. Values in atomic units.

|            | <b>x</b> | <b>y</b> | <b>z</b> |
|------------|----------|----------|----------|
| <b>N1</b>  | 0.4309   | -1.7272  | 0.2532   |
| <b>H2</b>  | 0.8447   | -3.5829  | 0.7143   |
| <b>H3</b>  | 0.2665   | -1.4400  | -1.6762  |
| <b>H4</b>  | -1.2264  | -1.1697  | 1.2264   |
| <b>C5</b>  | 2.2960   | 0.0586   | 1.3965   |
| <b>H6</b>  | 3.9061   | -0.9959  | 2.0806   |
| <b>C7</b>  | 3.0992   | 2.0976   | -0.5499  |
| <b>H8</b>  | 4.6620   | 3.2390   | 0.2740   |
| <b>H9</b>  | 1.4967   | 3.4166   | -0.8976  |
| <b>N10</b> | 2.8705   | 1.4740   | -5.3234  |
| <b>H11</b> | 1.5798   | 2.8062   | -5.6937  |
| <b>C12</b> | 3.9703   | 0.9713   | -3.0122  |
| <b>C13</b> | 4.1120   | 0.0605   | -7.0619  |
| <b>H14</b> | 3.6869   | 0.0926   | -9.0820  |
| <b>N15</b> | 5.9111   | -1.3058  | -6.0244  |
| <b>C16</b> | 5.8563   | -0.7124  | -3.4847  |
| <b>H17</b> | 7.2017   | -1.5760  | -2.2053  |
| <b>C18</b> | 1.0337   | 1.3568   | 3.6623   |
| <b>O19</b> | -1.2567  | 0.8504   | 4.1026   |
| <b>O20</b> | 2.3489   | 2.8648   | 4.9227   |

Table S6: serine atomic coordinates. Values in atomic units.

|            | <b>x</b> | <b>y</b> | <b>z</b> |
|------------|----------|----------|----------|
| <b>N1</b>  | -0.9959  | -0.2929  | -0.1606  |
| <b>H2</b>  | -1.3190  | -0.5291  | 1.8028   |
| <b>H3</b>  | -1.6932  | -1.8349  | -1.1395  |
| <b>H4</b>  | -1.7669  | 1.4041   | -0.7427  |
| <b>C5</b>  | 1.8330   | -0.2268  | -0.1436  |
| <b>H6</b>  | 2.5549   | -1.8746  | -1.1130  |
| <b>C7</b>  | 2.9158   | 2.2318   | -1.3285  |
| <b>H8</b>  | 2.4132   | 3.9080   | -0.1606  |
| <b>H9</b>  | 2.1543   | 2.5096   | -3.2673  |
| <b>O10</b> | 5.5955   | 2.0674   | -1.5193  |
| <b>H11</b> | 6.1586   | 1.5326   | 0.1682   |
| <b>C12</b> | 2.6985   | -0.3761  | 2.6286   |
| <b>O13</b> | 1.0186   | -0.5858  | 4.3086   |
| <b>O14</b> | 5.0267   | -0.2419  | 3.0538   |

Table S7: threonine atomic coordinates. Values in atomic units.

|            | <b>x</b> | <b>y</b> | <b>z</b> |
|------------|----------|----------|----------|
| <b>N1</b>  | -0.8787  | -0.3364  | -0.1323  |
| <b>H2</b>  | -1.4834  | -2.1751  | -0.3855  |
| <b>H3</b>  | -1.3776  | 0.8598   | -1.6119  |
| <b>H4</b>  | -1.4740  | 0.3420   | 1.6460   |
| <b>C5</b>  | 1.9464   | -0.2098  | 0.1531   |
| <b>H6</b>  | 2.7496   | -1.9672  | -0.4989  |
| <b>C7</b>  | 3.0557   | 2.0333   | -1.3323  |
| <b>H8</b>  | 2.8384   | 3.8172   | -0.2268  |
| <b>O9</b>  | 1.8217   | 2.3470   | -3.7114  |
| <b>H10</b> | 2.7477   | 3.6642   | -4.5712  |
| <b>C11</b> | 5.8619   | 1.5855   | -1.9294  |
| <b>H12</b> | 6.1170   | -0.1568  | -3.0708  |
| <b>H13</b> | 6.9655   | 1.3719   | -0.1531  |
| <b>H14</b> | 6.6745   | 3.2050   | -2.9877  |
| <b>C15</b> | 2.5247   | 0.0926   | 2.9858   |
| <b>O16</b> | 0.6803   | 0.4101   | 4.4692   |
| <b>O17</b> | 4.7848   | 0.0132   | 3.6812   |

Table S8: tyrosine atomic coordinates. Values in atomic units.

|            | <b>x</b> | <b>y</b> | <b>z</b> |
|------------|----------|----------|----------|
| <b>N1</b>  | -1.9294  | -0.5159  | 0.3912   |
| <b>H2</b>  | -2.4000  | -0.2986  | 2.3300   |
| <b>H3</b>  | -2.5341  | -2.2582  | -0.2532  |
| <b>H4</b>  | -2.6418  | 0.9921   | -0.6236  |
| <b>C5</b>  | 0.8768   | -0.3666  | 0.6217   |
| <b>H6</b>  | 1.6743   | -2.1581  | 0.0454   |
| <b>C7</b>  | 1.8538   | 1.8746   | -1.0261  |
| <b>H8</b>  | 1.7442   | 3.6831   | 0.0378   |
| <b>H9</b>  | 0.7351   | 2.0863   | -2.7873  |
| <b>C10</b> | 4.5561   | 1.4419   | -1.8217  |
| <b>C11</b> | 5.1079   | 0.2872   | -4.1536  |
| <b>H12</b> | 3.5905   | -0.3288  | -5.3706  |
| <b>C13</b> | 7.6175   | -0.0680  | -4.9227  |
| <b>H14</b> | 8.0351   | -0.9638  | -6.7104  |
| <b>C15</b> | 9.5998   | 0.7313   | -3.3732  |
| <b>O16</b> | 12.1150  | 0.3534   | -4.1517  |
| <b>H17</b> | 13.1884  | 0.9430   | -2.8157  |
| <b>C18</b> | 6.5706   | 2.2696   | -0.3024  |
| <b>H19</b> | 6.1756   | 3.1521   | 1.4986   |

|            |         |         |         |
|------------|---------|---------|---------|
| <b>C20</b> | 9.0820  | 1.9030  | -1.0601 |
| <b>H21</b> | 10.5957 | 2.5228  | 0.1568  |
| <b>C22</b> | 1.4286  | -0.0132 | 3.4790  |
| <b>O23</b> | -0.4403 | 0.1946  | 4.9549  |
| <b>O24</b> | 3.6812  | 0.0038  | 4.1952  |

Table S9: Ala-Ala atomic coordinates. Values in atomic units.

|            | <b>x</b> | <b>y</b> | <b>z</b> |
|------------|----------|----------|----------|
| <b>N1</b>  | 1.1924   | 2.7231   | 0.4838   |
| <b>H2</b>  | 0.1417   | 3.1199   | 2.1014   |
| <b>H3</b>  | 0.8390   | 4.0081   | -0.9354  |
| <b>H4</b>  | 3.0897   | 2.9631   | 1.1263   |
| <b>C5</b>  | 0.9014   | 0.0132   | -0.2910  |
| <b>H6</b>  | -1.0507  | -0.3005  | -0.8145  |
| <b>C7</b>  | 2.6853   | -0.5046  | -2.5492  |
| <b>H8</b>  | 4.6827   | -0.0435  | -2.0844  |
| <b>H9</b>  | 2.1297   | 0.6501   | -4.2122  |
| <b>H10</b> | 2.5889   | -2.5247  | -3.1180  |
| <b>C11</b> | 1.4419   | -1.6819  | 1.9615   |
| <b>O12</b> | -0.2986  | -2.5114  | 3.2409   |
| <b>N13</b> | 3.8947   | -1.9785  | 2.6003   |
| <b>H14</b> | 5.2761   | -1.8500  | 1.3398   |
| <b>C15</b> | 4.7375   | -0.8844  | 4.9624   |
| <b>H16</b> | 3.3939   | -1.2718  | 6.4610   |
| <b>C17</b> | 7.3907   | -1.8387  | 5.6805   |
| <b>H18</b> | 8.7702   | -1.3776  | 4.1687   |
| <b>H19</b> | 7.3586   | -3.9155  | 5.9640   |
| <b>H20</b> | 8.0276   | -0.9241  | 7.4606   |
| <b>C21</b> | 4.7810   | 2.0069   | 4.4314   |
| <b>O22</b> | 5.9148   | 2.7666   | 2.4737   |
| <b>O23</b> | 3.2390   | 3.3694   | 5.6144   |

Table S10: Asp-Asp atomic coordinates. Values in atomic units.

|           | <b>x</b> | <b>y</b> | <b>z</b> |
|-----------|----------|----------|----------|
| <b>N1</b> | -1.5439  | -0.1625  | -1.2453  |
| <b>H2</b> | -2.2034  | -1.9389  | -0.7238  |
| <b>H3</b> | -2.0957  | 0.2627   | -3.0784  |
| <b>H4</b> | -2.3017  | 1.1527   | 0.0227   |
| <b>C5</b> | 1.2718   | -0.0397  | -0.9543  |
| <b>H6</b> | 2.0674   | -1.7726  | -1.7008  |
| <b>C7</b> | 2.2677   | 2.3111   | -2.4472  |
| <b>H8</b> | 1.4022   | 4.0818   | -1.7234  |

|            |        |         |         |
|------------|--------|---------|---------|
| <b>H9</b>  | 1.8330 | 2.1354  | -4.4919 |
| <b>C10</b> | 5.1268 | 2.6513  | -2.2223 |
| <b>O11</b> | 6.1926 | 4.6279  | -1.8066 |
| <b>O12</b> | 6.3551 | 0.3987  | -2.4151 |
| <b>H13</b> | 7.9047 | 0.4989  | -1.4135 |
| <b>C14</b> | 1.8425 | 0.0548  | 1.8576  |
| <b>O15</b> | 0.2116 | 0.8258  | 3.3165  |
| <b>N16</b> | 4.1158 | -0.7521 | 2.6022  |
| <b>H17</b> | 5.4821 | -1.3304 | 1.4135  |
| <b>C18</b> | 5.3026 | -0.2665 | 4.9851  |
| <b>H19</b> | 4.6657 | 1.5345  | 5.7240  |
| <b>C20</b> | 4.8925 | -2.4831 | 6.8578  |
| <b>H21</b> | 6.1775 | -4.0837 | 6.4477  |
| <b>H22</b> | 2.9140 | -3.1596 | 6.6575  |
| <b>C23</b> | 5.1797 | -1.7045 | 9.6168  |
| <b>O24</b> | 3.5754 | -2.0674 | 11.2212 |
| <b>O25</b> | 7.4436 | -0.5707 | 10.1800 |
| <b>H26</b> | 8.4622 | -0.2665 | 8.6606  |
| <b>C27</b> | 8.1391 | -0.0340 | 4.2519  |
| <b>O28</b> | 8.7438 | -0.2872 | 1.9502  |
| <b>O29</b> | 9.7000 | 0.3439  | 5.9923  |

Table S11: Glu-Glu atomic coordinates. Values in atomic units.

|            | <b>x</b> | <b>y</b> | <b>z</b> |
|------------|----------|----------|----------|
| <b>N1</b>  | -1.8576  | 0.6727   | -0.1663  |
| <b>H2</b>  | -2.7288  | -0.8239  | 0.7616   |
| <b>H3</b>  | -2.6947  | 0.9902   | -1.9105  |
| <b>H4</b>  | -2.0239  | 2.2752   | 0.9789   |
| <b>C5</b>  | 0.9184   | 0.1720   | -0.4346  |
| <b>H6</b>  | 1.1849   | -1.7650  | -1.0337  |
| <b>C7</b>  | 2.0560   | 2.0050   | -2.4472  |
| <b>H8</b>  | 1.5534   | 3.9911   | -1.9483  |
| <b>H9</b>  | 1.1811   | 1.5647   | -4.3105  |
| <b>C10</b> | 4.9738   | 1.9048   | -2.7590  |
| <b>H11</b> | 5.6163   | -0.0567  | -3.1464  |
| <b>H12</b> | 5.9659   | 2.5644   | -1.0280  |
| <b>C13</b> | 5.8770   | 3.5338   | -4.9681  |
| <b>O14</b> | 6.2229   | 2.8251   | -7.1243  |
| <b>O15</b> | 6.1605   | 6.0377   | -4.3426  |
| <b>H16</b> | 6.8200   | 6.8918   | -5.7920  |
| <b>C17</b> | 2.1373   | 0.4535   | 2.1278   |
| <b>O18</b> | 1.0526   | 1.7140   | 3.7473   |
| <b>N19</b> | 4.3142   | -0.7540  | 2.5228   |

|            |         |         |         |
|------------|---------|---------|---------|
| <b>H20</b> | 5.3177  | -1.6781 | 1.1962  |
| <b>C21</b> | 6.0339  | -0.3439 | 4.5788  |
| <b>H22</b> | 5.8657  | 1.5609  | 5.2988  |
| <b>C23</b> | 5.7958  | -2.3452 | 6.7085  |
| <b>H24</b> | 7.4002  | -2.0560 | 8.0446  |
| <b>H25</b> | 6.0207  | -4.2481 | 5.8430  |
| <b>C26</b> | 3.2749  | -2.1921 | 8.1787  |
| <b>H27</b> | 1.6611  | -2.4340 | 6.8635  |
| <b>H28</b> | 3.1010  | -0.3175 | 9.1047  |
| <b>C29</b> | 3.0576  | -4.2557 | 10.1762 |
| <b>O30</b> | 1.7952  | -6.1700 | 10.0118 |
| <b>O31</b> | 4.4257  | -3.7719 | 12.3305 |
| <b>H32</b> | 4.2084  | -5.1760 | 13.4416 |
| <b>C33</b> | 8.6474  | -0.5877 | 3.2862  |
| <b>O34</b> | 8.6927  | -1.3814 | 1.0261  |
| <b>O35</b> | 10.5768 | 0.0246  | 4.5202  |

Table S12: His-His atomic coordinates. Values in atomic units.

|            | <b>x</b> | <b>y</b> | <b>z</b> |
|------------|----------|----------|----------|
| <b>N1</b>  | 0.8334   | 2.7363   | -1.3247  |
| <b>H2</b>  | -0.5990  | 4.0365   | -1.0337  |
| <b>H3</b>  | 1.3682   | 2.6626   | -3.2125  |
| <b>H4</b>  | 2.4359   | 3.4242   | -0.3099  |
| <b>C5</b>  | 0.1606   | 0.1417   | -0.3496  |
| <b>H6</b>  | -1.8406  | -0.1153  | -0.6803  |
| <b>C7</b>  | 1.6516   | -1.9974  | -1.7707  |
| <b>H8</b>  | 0.2305   | -3.3429  | -2.5398  |
| <b>H9</b>  | 2.8951   | -3.1369  | -0.5310  |
| <b>N10</b> | 5.5067   | 0.1625   | -3.6736  |
| <b>H11</b> | 6.3589   | 0.6841   | -2.0201  |
| <b>C12</b> | 3.2522   | -1.1149  | -3.9590  |
| <b>C13</b> | 6.4288   | 0.5934   | -6.0188  |
| <b>H14</b> | 8.2109   | 1.5741   | -6.3684  |
| <b>N15</b> | 4.9265   | -0.3231  | -7.7800  |
| <b>C16</b> | 2.9480   | -1.4343  | -6.4931  |
| <b>H17</b> | 1.4608   | -2.3811  | -7.5343  |
| <b>C18</b> | 0.5216   | 0.1550   | 2.4907   |
| <b>O19</b> | -1.1508  | 0.9638   | 3.8702   |
| <b>N20</b> | 2.8233   | -0.4687  | 3.3807   |
| <b>H21</b> | 3.9817   | -1.6554  | 2.5001   |
| <b>C22</b> | 4.3010   | 1.5193   | 4.5410   |
| <b>H23</b> | 3.1010   | 2.8743   | 5.4991   |
| <b>C24</b> | 6.3551   | 0.5235   | 6.3665   |

|            |        |         |         |
|------------|--------|---------|---------|
| <b>H25</b> | 7.4247 | 2.1600  | 7.1337  |
| <b>H26</b> | 7.7082 | -0.6916 | 5.3139  |
| <b>N27</b> | 2.9215 | -0.6784 | 9.5412  |
| <b>H28</b> | 1.5949 | 0.5027  | 8.8968  |
| <b>C29</b> | 5.3158 | -0.9770 | 8.5529  |
| <b>C30</b> | 2.6494 | -2.4264 | 11.3932 |
| <b>H31</b> | 0.9279 | -2.6475 | 12.5062 |
| <b>N32</b> | 4.6903 | -3.8286 | 11.6521 |
| <b>C33</b> | 6.3684 | -2.9215 | 9.8644  |
| <b>H34</b> | 8.2184 | -3.7757 | 9.6678  |
| <b>C35</b> | 5.5161 | 2.8100  | 2.2185  |
| <b>O36</b> | 7.1451 | 1.6100  | 0.9808  |
| <b>O37</b> | 4.4711 | 4.7923  | 1.4135  |

Table S13: Ser-Ser atomic coordinates. Values in atomic units.

|            | <b>x</b> | <b>y</b> | <b>z</b> |
|------------|----------|----------|----------|
| <b>N1</b>  | -1.4230  | 1.0299   | -1.1452  |
| <b>H2</b>  | -2.6929  | -0.0831  | -0.1285  |
| <b>H3</b>  | -1.9256  | 1.1093   | -3.0387  |
| <b>H4</b>  | -1.4626  | 2.8289   | -0.3420  |
| <b>C5</b>  | 1.1867   | -0.0491  | -0.7861  |
| <b>H6</b>  | 1.2699   | -1.8784  | -1.6932  |
| <b>C7</b>  | 3.2144   | 1.7556   | -1.9407  |
| <b>H8</b>  | 3.4525   | 3.4998   | -0.7861  |
| <b>H9</b>  | 2.6343   | 2.3376   | -3.8758  |
| <b>O10</b> | 5.5955   | 0.5310   | -2.1996  |
| <b>H11</b> | 6.6367   | 1.0904   | -0.7370  |
| <b>C12</b> | 1.6365   | -0.4157  | 2.0050   |
| <b>O13</b> | -0.0529  | 0.1436   | 3.4941   |
| <b>N14</b> | 3.8853   | -1.3209  | 2.7307   |
| <b>H15</b> | 5.1930   | -1.8009  | 1.4608   |
| <b>C16</b> | 5.0305   | -0.6161  | 5.1174   |
| <b>H17</b> | 3.6812   | 0.3042   | 6.3476   |
| <b>C18</b> | 6.2739   | -2.8610  | 6.5252   |
| <b>H19</b> | 7.7932   | -3.7020  | 5.3423   |
| <b>H20</b> | 4.8264   | -4.3331  | 6.9051   |
| <b>O21</b> | 7.3114   | -2.0352  | 8.8704   |
| <b>H22</b> | 8.1353   | -0.4327  | 8.4150   |
| <b>C23</b> | 7.1262   | 1.3247   | 4.4635   |
| <b>O24</b> | 7.4739   | 1.9030   | 2.1713   |
| <b>O25</b> | 8.4112   | 2.1996   | 6.2607   |



Table S14: Thr-Thr atomic coordinates. Values in atomic units.

|            | <b>x</b> | <b>y</b> | <b>z</b> |
|------------|----------|----------|----------|
| <b>N1</b>  | -1.2604  | 0.4989   | -1.3323  |
| <b>H2</b>  | -2.1429  | -1.1773  | -1.8311  |
| <b>H3</b>  | -1.3701  | 1.8293   | -2.7930  |
| <b>H4</b>  | -2.0485  | 1.2170   | 0.3326   |
| <b>C5</b>  | 1.5307   | 0.1323   | -0.8428  |
| <b>H6</b>  | 2.0598   | -1.7064  | -1.5552  |
| <b>C7</b>  | 3.1691   | 2.2034   | -2.1070  |
| <b>H8</b>  | 3.6887   | 3.7341   | -0.7483  |
| <b>O9</b>  | 1.8859   | 3.3694   | -4.1706  |
| <b>H10</b> | 3.0632   | 4.5788   | -4.8755  |
| <b>C11</b> | 5.5860   | 1.0261   | -3.2031  |
| <b>H12</b> | 5.1401   | -0.4403  | -4.6355  |
| <b>H13</b> | 6.7577   | 0.1531   | -1.6932  |
| <b>H14</b> | 6.7728   | 2.4944   | -4.1215  |
| <b>C15</b> | 1.8973   | 0.1512   | 1.9710   |
| <b>O16</b> | 0.0737   | 0.5272   | 3.3618   |
| <b>N17</b> | 4.2235   | -0.2457  | 2.8403   |
| <b>H18</b> | 5.8090   | -0.4649  | 1.8085   |
| <b>C19</b> | 5.0342   | -0.0094  | 5.4292   |
| <b>H20</b> | 4.0043   | 1.4834   | 6.3646   |
| <b>C21</b> | 4.9435   | -2.4737  | 6.9221   |
| <b>H22</b> | 6.2890   | -3.8702  | 6.0963   |
| <b>O23</b> | 2.4718   | -3.5300  | 6.8370   |
| <b>H24</b> | 1.3568   | -2.0957  | 6.8994   |
| <b>C25</b> | 5.5860   | -2.0258  | 9.7151   |
| <b>H26</b> | 4.2821   | -0.6198  | 10.5617  |
| <b>H27</b> | 7.5476   | -1.3020  | 9.9022   |
| <b>H28</b> | 5.4405   | -3.8210  | 10.7922  |
| <b>C29</b> | 7.7932   | 0.8579   | 5.0909   |
| <b>O30</b> | 8.8704   | 0.2835   | 3.0292   |
| <b>O31</b> | 8.7986   | 2.1524   | 6.8011   |

Table S15: Tyr-Tyr atomic coordinates. Values in atomic units.

|           | <b>x</b> | <b>y</b> | <b>z</b> |
|-----------|----------|----------|----------|
| <b>N1</b> | -2.3697  | 0.6047   | -2.1070  |
| <b>H2</b> | -3.3429  | -0.8636  | -1.2340  |
| <b>H3</b> | -2.9839  | 0.8428   | -3.9533  |
| <b>H4</b> | -2.6853  | 2.2488   | -1.0564  |
| <b>C5</b> | 0.4157   | 0.1209   | -2.0069  |
| <b>H6</b> | 0.7483   | -1.8368  | -2.5001  |
| <b>C7</b> | 1.7820   | 1.8463   | -4.0100  |

|            |         |         |         |
|------------|---------|---------|---------|
| <b>H8</b>  | 0.9751  | 3.7851  | -3.9930 |
| <b>H9</b>  | 1.5647  | 1.0620  | -5.9451 |
| <b>C10</b> | 4.5637  | 2.1014  | -3.4639 |
| <b>C11</b> | 6.1813  | 0.0510  | -3.9382 |
| <b>H12</b> | 5.4953  | -1.6119 | -4.8982 |
| <b>C13</b> | 8.6209  | 0.0208  | -2.9102 |
| <b>H14</b> | 9.7756  | -1.6592 | -3.0425 |
| <b>C15</b> | 9.4619  | 2.0560  | -1.4551 |
| <b>O16</b> | 11.6218 | 1.7631  | 0.0548  |
| <b>H17</b> | 11.0322 | 0.7540  | 1.5061  |
| <b>C18</b> | 5.4934  | 4.2216  | -2.1543 |
| <b>H19</b> | 4.2670  | 5.7939  | -1.7310 |
| <b>C20</b> | 7.9368  | 4.1876  | -1.1357 |
| <b>H21</b> | 8.5812  | 5.7089  | 0.0624  |
| <b>C22</b> | 1.2831  | 0.4176  | 0.7238  |
| <b>O23</b> | 0.0756  | 1.8293  | 2.1165  |
| <b>N24</b> | 3.2692  | -0.9449 | 1.5004  |
| <b>H25</b> | 4.3010  | -2.1448 | 0.4498  |
| <b>C26</b> | 4.5675  | -0.6992 | 3.8720  |
| <b>H27</b> | 4.7546  | 1.2718  | 4.3861  |
| <b>C28</b> | 3.2825  | -2.3074 | 5.9659  |
| <b>H29</b> | 3.4450  | -4.3501 | 5.5123  |
| <b>H30</b> | 1.2472  | -1.8066 | 6.0641  |
| <b>C31</b> | 4.4560  | -1.8406 | 8.5227  |
| <b>C32</b> | 3.2201  | -0.3288 | 10.3255 |
| <b>H33</b> | 1.4400  | 0.5480  | 9.8549  |
| <b>C34</b> | 4.2878  | 0.0586  | 12.7216 |
| <b>H35</b> | 3.3391  | 1.2321  | 14.0936 |
| <b>C36</b> | 6.5970  | -1.0658 | 13.3339 |
| <b>O37</b> | 7.6761  | -0.6576 | 15.7320 |
| <b>H38</b> | 9.2956  | -1.4683 | 15.7301 |
| <b>C39</b> | 6.7596  | -2.9839 | 9.1784  |
| <b>H40</b> | 7.7290  | -4.1423 | 7.8008  |
| <b>C41</b> | 7.8405  | -2.5889 | 11.5651 |
| <b>H42</b> | 9.6282  | -3.4601 | 12.0092 |
| <b>C43</b> | 7.2036  | -1.7537 | 3.1558  |
| <b>O44</b> | 7.2395  | -3.7190 | 1.7971  |
| <b>O45</b> | 9.1614  | -0.5707 | 3.8059  |

Table S16: Gly-Gly atomic coordinates. Values in atomic units.

|           | <b>x</b> | <b>y</b> | <b>z</b> |
|-----------|----------|----------|----------|
| <b>N1</b> | -1.0904  | -0.3439  | -0.8466  |
| <b>H2</b> | -1.8463  | 0.1058   | -2.6003  |

|            |         |         |         |
|------------|---------|---------|---------|
| <b>H3</b>  | -2.0050 | 0.6727  | 0.5820  |
| <b>H4</b>  | -1.3512 | -2.2563 | -0.4611 |
| <b>C5</b>  | 1.6762  | 0.3005  | -0.6746 |
| <b>H6</b>  | 1.9615  | 2.1694  | -1.4494 |
| <b>H7</b>  | 2.7609  | -1.1679 | -1.5987 |
| <b>C8</b>  | 2.4264  | 0.3931  | 2.0390  |
| <b>O9</b>  | 0.7691  | 0.5839  | 3.6510  |
| <b>N10</b> | 4.8831  | 0.2381  | 2.5568  |
| <b>H11</b> | 6.3155  | 0.0397  | 1.3096  |
| <b>C12</b> | 6.0282  | 0.1701  | 5.0248  |
| <b>H13</b> | 5.2818  | -1.3871 | 6.1133  |
| <b>H14</b> | 5.8941  | 2.0031  | 5.9130  |
| <b>C15</b> | 8.8194  | -0.3685 | 4.4749  |
| <b>O16</b> | 9.4713  | -0.5801 | 2.1826  |
| <b>O17</b> | 10.2990 | -0.5707 | 6.3155  |

Table S17: Ala-Ala-Ala atomic coordinates. Values in atomic units.

|            | <b>x</b> | <b>y</b> | <b>z</b> |
|------------|----------|----------|----------|
| <b>N1</b>  | -1.8708  | 0.1890   | -1.3474  |
| <b>H2</b>  | -2.7703  | -0.7880  | 0.1191   |
| <b>H3</b>  | -2.4907  | -0.4611  | -3.0916  |
| <b>H4</b>  | -2.2941  | 2.0976   | -1.1527  |
| <b>C5</b>  | 0.9127   | -0.1909  | -1.0186  |
| <b>H6</b>  | 1.3984   | -2.0371  | -1.7556  |
| <b>C7</b>  | 2.3414   | 1.9067   | -2.4699  |
| <b>H8</b>  | 1.9559   | 3.8097   | -1.6686  |
| <b>H9</b>  | 1.8047   | 1.9200   | -4.5013  |
| <b>H10</b> | 4.4182   | 1.5874   | -2.3924  |
| <b>C11</b> | 1.5137   | -0.2287  | 1.7801   |
| <b>O12</b> | -0.2362  | -0.5953  | 3.2598   |
| <b>N13</b> | 3.9155   | 0.1606   | 2.5039   |
| <b>H14</b> | 5.3252   | 0.4535   | 1.2737   |
| <b>C15</b> | 4.9303   | -0.1814  | 5.0172   |
| <b>H16</b> | 4.4333   | 1.4286   | 6.1718   |
| <b>C17</b> | 4.1839   | -2.7023  | 6.3060   |
| <b>H18</b> | 4.6714   | -4.3388  | 5.0853   |
| <b>H19</b> | 2.1241   | -2.7496  | 6.6972   |
| <b>H20</b> | 5.1797   | -2.9253  | 8.1428   |
| <b>C21</b> | 7.7592   | -0.1587  | 4.5996   |
| <b>O22</b> | 8.5869   | -0.3231  | 2.4264   |
| <b>N23</b> | 9.2351   | 0.1663   | 6.6235   |
| <b>H24</b> | 8.6398   | 0.2305   | 8.4244   |
| <b>C25</b> | 11.9431  | 0.1304   | 6.6367   |

|            |         |         |         |
|------------|---------|---------|---------|
| <b>H26</b> | 12.6234 | -1.4305 | 5.5104  |
| <b>C27</b> | 13.0637 | 2.6759  | 5.7618  |
| <b>H28</b> | 12.3494 | 4.2292  | 6.9750  |
| <b>H29</b> | 12.5270 | 3.0538  | 3.7719  |
| <b>H30</b> | 15.1575 | 2.6192  | 5.9092  |
| <b>C31</b> | 12.6820 | -0.3874 | 9.4222  |
| <b>O32</b> | 10.9358 | -0.3817 | 11.0568 |
| <b>O33</b> | 14.9685 | -0.7994 | 9.9230  |

Table S18: Asp-Asp-Asp atomic coordinates. Values in atomic units.

|            | <b>x</b> | <b>y</b> | <b>z</b> |
|------------|----------|----------|----------|
| <b>N1</b>  | -1.7763  | 0.3326   | 0.0416   |
| <b>H2</b>  | -2.5700  | -0.5877  | 1.5987   |
| <b>H3</b>  | -2.3886  | -0.5027  | -1.6233  |
| <b>H4</b>  | -2.3395  | 2.2223   | 0.1209   |
| <b>C5</b>  | 1.0412   | 0.2570   | 0.2948   |
| <b>H6</b>  | 1.5439   | -1.6856  | 0.7086   |
| <b>C7</b>  | 2.3395   | 1.1811   | -2.1902  |
| <b>H8</b>  | 1.8784   | 3.1899   | -2.5851  |
| <b>H9</b>  | 1.7310   | 0.0170   | -3.8248  |
| <b>C10</b> | 5.2175   | 0.9808   | -2.0371  |
| <b>O11</b> | 6.7123   | 2.5587   | -2.7401  |
| <b>O12</b> | 5.9621   | -1.1981  | -0.8636  |
| <b>H13</b> | 7.7630   | -1.1130  | -0.4970  |
| <b>C14</b> | 1.7178   | 1.8255   | 2.5908   |
| <b>O15</b> | 0.3326   | 3.5678   | 3.2409   |
| <b>N16</b> | 3.7681   | 1.1074   | 3.8872   |
| <b>H17</b> | 4.9246   | -0.2438  | 3.2352   |
| <b>C18</b> | 4.3294   | 1.7971   | 6.4591   |
| <b>H19</b> | 4.8906   | 3.7643   | 6.5139   |
| <b>C20</b> | 2.1203   | 1.2831   | 8.3620   |
| <b>H21</b> | 0.6406   | 2.7401   | 8.0729   |
| <b>H22</b> | 2.8119   | 1.4702   | 10.3330  |
| <b>C23</b> | 0.8504   | -1.2888  | 7.9879   |
| <b>O24</b> | -0.4157  | -1.9426  | 6.1681   |
| <b>O25</b> | 1.1981   | -2.9026  | 9.9853   |
| <b>H26</b> | 0.4460   | -4.4975  | 9.5998   |
| <b>C27</b> | 6.6329   | 0.2041   | 7.0373   |
| <b>O28</b> | 6.5819   | -2.0863  | 6.6462   |
| <b>N29</b> | 8.7286   | 1.4192   | 7.7460   |
| <b>H30</b> | 8.8194   | 3.2390   | 8.2808   |
| <b>C31</b> | 11.1834  | 0.3156   | 8.1050   |
| <b>H32</b> | 11.0247  | -1.4778  | 9.0764   |

|            |         |         |         |
|------------|---------|---------|---------|
| <b>C33</b> | 12.7273 | 0.1512  | 5.6125  |
| <b>H34</b> | 14.6983 | -0.4309 | 6.0452  |
| <b>H35</b> | 12.7745 | 2.0333  | 4.6922  |
| <b>C36</b> | 11.5689 | -1.7272 | 3.7983  |
| <b>O37</b> | 10.2669 | -1.2548 | 1.9464  |
| <b>O38</b> | 12.1358 | -4.1952 | 4.3823  |
| <b>H39</b> | 11.2363 | -5.2742 | 3.2560  |
| <b>C40</b> | 12.5572 | 2.1807  | 9.8870  |
| <b>O41</b> | 11.5198 | 4.2935  | 10.3066 |
| <b>O42</b> | 14.6492 | 1.5193  | 10.7998 |

Table S19: Glu-Glu-Glu atomic coordinates. Values in atomic units.

|            | <b>x</b> | <b>y</b> | <b>z</b> |
|------------|----------|----------|----------|
| <b>N1</b>  | -2.9650  | 0.3345   | -1.2359  |
| <b>H2</b>  | -3.9949  | -1.0582  | -0.3080  |
| <b>H3</b>  | -3.5773  | 0.5140   | -3.0916  |
| <b>H4</b>  | -3.2484  | 2.0277   | -0.2589  |
| <b>C5</b>  | -0.1871  | -0.2494  | -1.1055  |
| <b>H6</b>  | 0.0888   | -2.2091  | -1.6214  |
| <b>C7</b>  | 1.2642   | 1.5288   | -2.9555  |
| <b>H8</b>  | 1.2302   | 3.5092   | -2.2374  |
| <b>H9</b>  | 0.2627   | 1.5212   | -4.8131  |
| <b>C10</b> | 4.0402   | 0.7483   | -3.5073  |
| <b>H11</b> | 4.1309   | -1.2245  | -4.2179  |
| <b>H12</b> | 5.2421   | 0.8901   | -1.7934  |
| <b>C13</b> | 5.2534   | 2.4226   | -5.5350  |
| <b>O14</b> | 5.6673   | 1.8217   | -7.7082  |
| <b>O15</b> | 5.8015   | 4.7999   | -4.6733  |
| <b>H16</b> | 6.6443   | 5.6994   | -5.9999  |
| <b>C17</b> | 0.6709   | 0.1172   | 1.6025   |
| <b>O18</b> | -0.7294  | 1.2245   | 3.0803   |
| <b>N19</b> | 2.9196   | -0.8126  | 2.3017   |
| <b>H20</b> | 4.1139   | -1.7178  | 1.1414   |
| <b>C21</b> | 4.0459   | -0.4233  | 4.7508   |
| <b>H22</b> | 3.7001   | 1.4872   | 5.3933   |
| <b>C23</b> | 3.1275   | -2.3981  | 6.7199   |
| <b>H24</b> | 3.5999   | -4.3331  | 6.0415   |
| <b>H25</b> | 1.0280   | -2.2488  | 6.7992   |
| <b>C26</b> | 4.1801   | -2.0201  | 9.4278   |
| <b>H27</b> | 3.8021   | -0.0624  | 10.0836  |
| <b>H28</b> | 6.2550   | -2.3376  | 9.4921   |
| <b>C29</b> | 2.9536   | -3.8135  | 11.3232  |
| <b>O30</b> | 1.3682   | -3.2673  | 12.8974  |

|            |         |         |         |
|------------|---------|---------|---------|
| <b>O31</b> | 3.7587  | -6.2739 | 11.0889 |
| <b>H32</b> | 2.9555  | -7.2320 | 12.3890 |
| <b>C33</b> | 6.8370  | -0.6954 | 4.2065  |
| <b>O34</b> | 7.5098  | -1.7745 | 2.2544  |
| <b>N35</b> | 8.4603  | 0.3534  | 5.8279  |
| <b>H36</b> | 7.9973  | 1.1679  | 7.4795  |
| <b>C37</b> | 11.1626 | 0.1568  | 5.7315  |
| <b>H38</b> | 11.7050 | -1.7348 | 5.1892  |
| <b>C39</b> | 12.3059 | 2.2015  | 3.9684  |
| <b>H40</b> | 11.9053 | 4.0969  | 4.7829  |
| <b>H41</b> | 11.2949 | 2.0674  | 2.1297  |
| <b>C42</b> | 15.1726 | 1.8784  | 3.4941  |
| <b>H43</b> | 15.5581 | -0.0416 | 2.7477  |
| <b>H44</b> | 16.2101 | 2.1014  | 5.3082  |
| <b>C45</b> | 16.1779 | 3.8154  | 1.6214  |
| <b>O46</b> | 14.9553 | 5.2988  | 0.3534  |
| <b>O47</b> | 18.7725 | 3.7606  | 1.3852  |
| <b>H48</b> | 19.2223 | 5.0418  | 0.1984  |
| <b>C49</b> | 11.9657 | 0.5953  | 8.5151  |
| <b>O50</b> | 10.3122 | 1.4211  | 10.0344 |
| <b>O51</b> | 14.1975 | 0.0775  | 9.1463  |

Table S20: His-His-His atomic coordinates. Values in atomic units.

|            | <b>x</b> | <b>y</b> | <b>z</b> |
|------------|----------|----------|----------|
| <b>N1</b>  | -2.1486  | 1.2926   | -0.9997  |
| <b>H2</b>  | -3.2976  | 0.2929   | 0.2476   |
| <b>H3</b>  | -2.9196  | 1.2453   | -2.8044  |
| <b>H4</b>  | -2.0730  | 3.1540   | -0.3534  |
| <b>C5</b>  | 0.4894   | 0.2211   | -0.9392  |
| <b>H6</b>  | 0.3704   | -1.7820  | -1.3323  |
| <b>C7</b>  | 2.1486   | 1.5515   | -2.9669  |
| <b>H8</b>  | 2.5001   | 3.5565   | -2.4302  |
| <b>H9</b>  | 1.1603   | 1.5685   | -4.8226  |
| <b>N10</b> | 4.9719   | -2.0088  | -4.5883  |
| <b>H11</b> | 3.6434   | -3.1577  | -5.2837  |
| <b>C12</b> | 4.6620   | 0.3080   | -3.4261  |
| <b>C13</b> | 7.4928   | -2.3678  | -4.8755  |
| <b>H14</b> | 8.3224   | -4.0440  | -5.7542  |
| <b>N15</b> | 8.8023   | -0.4460  | -4.0119  |
| <b>C16</b> | 7.0392   | 1.2434   | -3.0954  |
| <b>H17</b> | 7.6477   | 3.0292   | -2.2960  |
| <b>C18</b> | 1.5779   | 0.5329   | 1.6951   |
| <b>O19</b> | 0.4006   | 1.8141   | 3.2277   |

|            |         |         |         |
|------------|---------|---------|---------|
| <b>N20</b> | 3.7511  | -0.6406 | 2.2809  |
| <b>H21</b> | 4.8112  | -1.6063 | 1.0337  |
| <b>C22</b> | 4.9927  | -0.5027 | 4.7243  |
| <b>H23</b> | 5.0456  | 1.4381  | 5.3668  |
| <b>C24</b> | 3.8550  | -2.2658 | 6.7936  |
| <b>H25</b> | 5.3177  | -3.4355 | 7.7498  |
| <b>H26</b> | 2.5058  | -3.5961 | 5.8941  |
| <b>N27</b> | 0.7049  | 0.9638  | 8.4698  |
| <b>H28</b> | 0.1946  | 1.6384  | 6.7709  |
| <b>C29</b> | 2.5133  | -0.8636 | 8.8723  |
| <b>C30</b> | -0.0680 | 1.7839  | 10.7677 |
| <b>H31</b> | -1.4834 | 3.2579  | 11.0417 |
| <b>N32</b> | 1.1168  | 0.6123  | 12.6120 |
| <b>C33</b> | 2.7533  | -1.0507 | 11.4291 |
| <b>H34</b> | 3.9949  | -2.2450 | 12.5383 |
| <b>C35</b> | 7.6836  | -1.2642 | 4.2046  |
| <b>O36</b> | 8.2146  | -2.2563 | 2.1694  |
| <b>N37</b> | 9.3825  | -0.7956 | 6.0150  |
| <b>H38</b> | 8.9252  | -0.2400 | 7.7611  |
| <b>C39</b> | 11.9771 | -1.6119 | 5.9564  |
| <b>H40</b> | 12.2322 | -3.1105 | 4.5920  |
| <b>C41</b> | 13.8347 | 0.6009  | 5.4840  |
| <b>H42</b> | 15.7887 | -0.1701 | 5.4235  |
| <b>H43</b> | 13.7232 | 1.9426  | 7.0959  |
| <b>N44</b> | 12.8709 | 0.9354  | 0.7748  |
| <b>H45</b> | 12.4986 | -0.8976 | 0.4819  |
| <b>C46</b> | 13.3434 | 2.0466  | 3.0803  |
| <b>C47</b> | 12.4854 | 2.8233  | -0.9071 |
| <b>H48</b> | 12.0319 | 2.4737  | -2.8894 |
| <b>N49</b> | 12.6479 | 5.0701  | 0.1587  |
| <b>C50</b> | 13.2016 | 4.5807  | 2.6702  |
| <b>H51</b> | 13.4435 | 6.1246  | 3.9911  |
| <b>C52</b> | 12.5346 | -2.7155 | 8.5983  |
| <b>O53</b> | 10.8867 | -2.4340 | 10.3028 |
| <b>O54</b> | 14.6170 | -3.8135 | 8.9252  |

Table S21: Ser-Ser-Ser atomic coordinates. Values in atomic units.

|           | <b>x</b> | <b>y</b> | <b>z</b> |
|-----------|----------|----------|----------|
| <b>N1</b> | -1.9105  | 1.9351   | -0.5631  |
| <b>H2</b> | -2.8516  | 1.3814   | 1.0866   |
| <b>H3</b> | -3.0614  | 1.6554   | -2.1278  |
| <b>H4</b> | -1.4608  | 3.8361   | -0.3647  |
| <b>C5</b> | 0.4649   | 0.3647   | -0.6973  |

|            |         |         |         |
|------------|---------|---------|---------|
| <b>H6</b>  | -0.0510 | -1.5023 | -1.3512 |
| <b>C7</b>  | 2.4850  | 1.5515  | -2.4907 |
| <b>H8</b>  | 3.5262  | 3.1294  | -1.5609 |
| <b>H9</b>  | 1.5515  | 2.3149  | -4.2141 |
| <b>O10</b> | 4.2046  | -0.3534 | -3.3108 |
| <b>H11</b> | 5.6087  | 0.4384  | -4.1820 |
| <b>C12</b> | 1.4891  | 0.0926  | 1.9445  |
| <b>O13</b> | 0.1493  | 0.7502  | 3.7228  |
| <b>N14</b> | 3.8286  | -0.8258 | 2.2393  |
| <b>H15</b> | 4.9038  | -1.2642 | 0.7427  |
| <b>C16</b> | 5.0342  | -1.2113 | 4.6733  |
| <b>H17</b> | 4.0686  | -0.1398 | 6.1227  |
| <b>C18</b> | 5.2138  | -4.0289 | 5.4764  |
| <b>H19</b> | 6.0698  | -4.1744 | 7.3964  |
| <b>H20</b> | 6.4270  | -5.0909 | 4.1234  |
| <b>O21</b> | 2.7666  | -5.1627 | 5.5048  |
| <b>H22</b> | 2.9215  | -6.7652 | 6.3551  |
| <b>C23</b> | 7.6836  | -0.1984 | 4.4446  |
| <b>O24</b> | 8.6039  | 0.2457  | 2.3546  |
| <b>N25</b> | 8.9441  | 0.2494  | 6.5819  |
| <b>H26</b> | 8.3016  | -0.0926 | 8.3394  |
| <b>C27</b> | 11.5557 | 1.0110  | 6.7898  |
| <b>H28</b> | 12.7311 | -0.2041 | 5.6465  |
| <b>C29</b> | 12.0602 | 3.8361  | 6.1926  |
| <b>H30</b> | 14.0709 | 4.2991  | 6.6065  |
| <b>H31</b> | 10.8432 | 5.0361  | 7.4172  |
| <b>O32</b> | 11.5481 | 4.3804  | 3.5961  |
| <b>H33</b> | 10.4804 | 2.9971  | 3.0236  |
| <b>C34</b> | 12.2303 | 0.5310  | 9.5790  |
| <b>O35</b> | 10.4842 | -0.2135 | 11.0341 |
| <b>O36</b> | 14.4734 | 0.8976  | 10.2688 |

Table S22: Thr-Thr-Thr atomic coordinates. Values in atomic units.

|           | <b>x</b> | <b>y</b> | <b>z</b> |
|-----------|----------|----------|----------|
| <b>N1</b> | -1.7499  | 0.6765   | -1.1679  |
| <b>H2</b> | -2.6872  | -1.0375  | -0.9978  |
| <b>H3</b> | -2.0919  | 1.5004   | -2.9329  |
| <b>H4</b> | -2.3206  | 1.8935   | 0.2759   |
| <b>C5</b> | 1.0866   | 0.3609   | -0.9694  |
| <b>H6</b> | 1.5760   | -1.4645  | -1.7423  |
| <b>C7</b> | 2.4888   | 2.4604   | -2.4170  |
| <b>H8</b> | 2.5360   | 4.2557   | -1.3096  |
| <b>O9</b> | 1.2434   | 2.9688   | -4.7470  |



|            |         |         |         |
|------------|---------|---------|---------|
| <b>H10</b> | 2.2885  | 4.1706  | -5.6484 |
| <b>C11</b> | 5.1930  | 1.6422  | -3.0821 |
| <b>H12</b> | 5.1967  | -0.1266 | -4.2141 |
| <b>H13</b> | 6.3570  | 1.3398  | -1.3625 |
| <b>H14</b> | 6.1586  | 3.1275  | -4.2141 |
| <b>C15</b> | 1.7745  | 0.4403  | 1.7839  |
| <b>O16</b> | 0.3723  | 1.5515  | 3.2598  |
| <b>N17</b> | 3.8758  | -0.7540 | 2.5511  |
| <b>H18</b> | 5.0758  | -1.6516 | 1.3984  |
| <b>C19</b> | 4.6903  | -0.8296 | 5.1741  |
| <b>H20</b> | 4.1668  | 0.8995  | 6.1265  |
| <b>C21</b> | 3.7530  | -3.1426 | 6.6292  |
| <b>H22</b> | 4.6506  | -4.9038 | 5.8941  |
| <b>O23</b> | 1.1017  | -3.4299 | 6.3230  |
| <b>H24</b> | 0.3666  | -1.9219 | 7.0222  |
| <b>C25</b> | 4.2613  | -2.8988 | 9.4751  |
| <b>H26</b> | 3.4204  | -1.1414 | 10.2499 |
| <b>H27</b> | 6.3230  | -2.8781 | 9.8795  |
| <b>H28</b> | 3.4355  | -4.5372 | 10.5012 |
| <b>C29</b> | 7.5211  | -0.9222 | 4.9662  |
| <b>O30</b> | 8.5132  | -1.9521 | 3.1313  |
| <b>N31</b> | 8.8855  | 0.2570  | 6.7293  |
| <b>H32</b> | 8.2014  | 1.1584  | 8.2562  |
| <b>C33</b> | 11.6143 | 0.3175  | 6.8521  |
| <b>H34</b> | 12.3758 | -1.5458 | 6.5120  |
| <b>C35</b> | 12.8350 | 2.2885  | 5.1363  |
| <b>H36</b> | 12.1415 | 4.2103  | 5.6522  |
| <b>O37</b> | 12.2095 | 1.8085  | 2.5644  |
| <b>H38</b> | 11.1305 | 0.3288  | 2.6381  |
| <b>C39</b> | 15.7301 | 2.2053  | 5.3328  |
| <b>H40</b> | 16.4387 | 0.2910  | 4.8528  |
| <b>H41</b> | 16.3442 | 2.6664  | 7.2868  |
| <b>H42</b> | 16.5899 | 3.5943  | 4.0194  |
| <b>C43</b> | 12.1037 | 1.0072  | 9.6319  |
| <b>O44</b> | 10.5333 | 2.4718  | 10.6807 |
| <b>O45</b> | 13.9613 | 0.0321  | 10.7412 |

Table S23: Tyr-Tyr-Tyr atomic coordinates. Values in atomic units.

|           | <b>x</b> | <b>y</b> | <b>z</b> |
|-----------|----------|----------|----------|
| <b>N1</b> | -3.1313  | -0.0510  | -2.0806  |
| <b>H2</b> | -4.0100  | -1.7045  | -1.4853  |
| <b>H3</b> | -3.5905  | 0.3307   | -3.9495  |
| <b>H4</b> | -3.7643  | 1.4173   | -0.9146  |

|            |         |         |         |
|------------|---------|---------|---------|
| <b>C5</b>  | -0.3250 | -0.2268 | -1.7234 |
| <b>H6</b>  | 0.2986  | -2.0655 | -2.3697 |
| <b>C7</b>  | 0.9600  | 1.9181  | -3.2938 |
| <b>H8</b>  | 0.3307  | 3.8135  | -2.6324 |
| <b>H9</b>  | 0.4630  | 1.7499  | -5.3271 |
| <b>C10</b> | 3.8059  | 1.8198  | -3.1256 |
| <b>C11</b> | 5.1760  | 0.0794  | -4.5920 |
| <b>H12</b> | 4.2065  | -1.1924 | -5.8582 |
| <b>C13</b> | 7.8197  | -0.0208 | -4.4371 |
| <b>H14</b> | 8.8742  | -1.3625 | -5.5577 |
| <b>C15</b> | 9.1160  | 1.6157  | -2.8195 |
| <b>O16</b> | 11.7692 | 1.4815  | -2.6759 |
| <b>H17</b> | 12.3135 | 2.5455  | -1.3096 |
| <b>C18</b> | 5.1344  | 3.4809  | -1.5288 |
| <b>H19</b> | 4.1215  | 4.8415  | -0.3931 |
| <b>C20</b> | 7.7762  | 3.3694  | -1.3644 |
| <b>H21</b> | 8.7683  | 4.6393  | -0.1096 |
| <b>C22</b> | 0.2305  | -0.0302 | 1.0847  |
| <b>O23</b> | -1.3266 | 1.0110  | 2.4529  |
| <b>N24</b> | 2.3811  | -1.0318 | 1.9842  |
| <b>H25</b> | 3.6906  | -1.8878 | 0.9146  |
| <b>C26</b> | 3.2390  | -0.6954 | 4.5486  |
| <b>H27</b> | 2.8459  | 1.2245  | 5.1363  |
| <b>C28</b> | 1.9540  | -2.5851 | 6.4345  |
| <b>H29</b> | 2.0976  | -4.5391 | 5.6843  |
| <b>H30</b> | -0.0718 | -2.0995 | 6.6726  |
| <b>C31</b> | 3.2182  | -2.4793 | 8.9819  |
| <b>C32</b> | 2.9858  | -0.2948 | 10.4766 |
| <b>H33</b> | 1.6837  | 1.1792  | 9.9362  |
| <b>C34</b> | 4.6620  | 0.1247  | 12.4854 |
| <b>H35</b> | 4.6620  | 1.9086  | 13.4775 |
| <b>C36</b> | 6.5385  | -1.6535 | 13.0240 |
| <b>O37</b> | 8.5737  | -0.9845 | 14.5887 |
| <b>H38</b> | 9.8870  | -0.4044 | 13.4000 |
| <b>C39</b> | 4.9832  | -4.3445 | 9.6659  |
| <b>H40</b> | 5.2364  | -5.9904 | 8.4886  |
| <b>C41</b> | 6.6594  | -3.9155 | 11.6691 |
| <b>H42</b> | 8.1787  | -5.2270 | 12.0376 |
| <b>C43</b> | 6.1076  | -0.9260 | 4.4144  |
| <b>O44</b> | 7.0638  | -2.2507 | 2.7609  |
| <b>N45</b> | 7.4814  | 0.4044  | 6.0830  |
| <b>H46</b> | 6.7463  | 1.5307  | 7.4115  |
| <b>C47</b> | 10.1724 | 0.2343  | 6.4270  |
| <b>H48</b> | 10.7412 | -1.7272 | 6.4666  |
| <b>C49</b> | 11.5859 | 1.7612  | 4.3539  |

|            |         |         |         |
|------------|---------|---------|---------|
| <b>H50</b> | 11.1551 | 3.8059  | 4.5524  |
| <b>H51</b> | 10.9056 | 1.1036  | 2.4850  |
| <b>C52</b> | 14.4054 | 1.3908  | 4.4711  |
| <b>C53</b> | 15.6375 | -0.1965 | 2.7325  |
| <b>H54</b> | 14.5396 | -1.2170 | 1.3455  |
| <b>C55</b> | 18.2718 | -0.4819 | 2.7987  |
| <b>H56</b> | 19.2072 | -1.7140 | 1.4683  |
| <b>C57</b> | 19.6947 | 0.8201  | 4.6034  |
| <b>O58</b> | 22.3385 | 0.5159  | 4.6790  |
| <b>H59</b> | 22.9356 | 1.4362  | 6.1189  |
| <b>C60</b> | 15.8643 | 2.7118  | 6.2550  |
| <b>H61</b> | 14.9269 | 3.9287  | 7.6043  |
| <b>C62</b> | 18.4947 | 2.4170  | 6.3363  |
| <b>H63</b> | 19.5700 | 3.4261  | 7.7460  |
| <b>C64</b> | 10.5655 | 1.3833  | 9.0915  |
| <b>O65</b> | 9.6017  | 3.5243  | 9.5072  |
| <b>O66</b> | 11.7144 | 0.1247  | 10.7544 |

Table S24: Gly-Gly-Gly atomic coordinates. Values in atomic units.

|            | <b>x</b> | <b>y</b> | <b>z</b> |
|------------|----------|----------|----------|
| <b>N1</b>  | -1.6800  | -0.4630  | -1.2926  |
| <b>H2</b>  | -2.3848  | -0.1644  | -3.1029  |
| <b>H3</b>  | -2.6740  | 0.6387   | 0.0113   |
| <b>H4</b>  | -1.9426  | -2.3433  | -0.7729  |
| <b>C5</b>  | 1.0847   | 0.2135   | -1.0904  |
| <b>H6</b>  | 1.3398   | 2.1014   | -1.8293  |
| <b>H7</b>  | 2.1770   | -1.2170  | -2.0598  |
| <b>C8</b>  | 1.8746   | 0.2476   | 1.6252   |
| <b>O9</b>  | 0.2513   | 0.0643   | 3.2654   |
| <b>N10</b> | 4.3426   | 0.4762   | 2.1562   |
| <b>H11</b> | 5.7221   | 0.5745   | 0.8579   |
| <b>C12</b> | 5.3479   | 0.4063   | 4.7054   |
| <b>H13</b> | 4.6072   | -1.2094  | 5.7126   |
| <b>H14</b> | 5.0210   | 2.2072   | 5.6144   |
| <b>C15</b> | 8.1353   | 0.0510   | 4.4182   |
| <b>O16</b> | 9.0367   | -0.1682  | 2.2866   |
| <b>N17</b> | 9.5204   | 0.0132   | 6.5271   |
| <b>H18</b> | 8.8609   | 0.1965   | 8.2997   |
| <b>C19</b> | 12.2284  | -0.2891  | 6.6405   |
| <b>H20</b> | 13.1374  | 1.2812   | 5.7089   |
| <b>H21</b> | 12.7462  | -2.1297  | 5.9281   |
| <b>C22</b> | 12.9276  | -0.1890  | 9.4486   |
| <b>O23</b> | 11.1626  | 0.1115   | 11.0284  |

|            |         |         |         |
|------------|---------|---------|---------|
| <b>O24</b> | 15.2199 | -0.4120 | 10.0307 |
|------------|---------|---------|---------|

Table S25: atomic coordinates of a cluster composed by glycine surrounded by fifty-eight water molecules. Values in atomic units.

|            | <b>x</b> | <b>y</b> | <b>z</b> |
|------------|----------|----------|----------|
| <b>N1</b>  | 0.6179   | 1.0431   | -1.0771  |
| <b>H2</b>  | 2.1675   | 1.4400   | 0.1020   |
| <b>H3</b>  | -0.0113  | 2.7439   | -1.8765  |
| <b>H4</b>  | 1.2699   | -0.1247  | -2.5247  |
| <b>C5</b>  | -1.4003  | -0.1361  | 0.4857   |
| <b>H6</b>  | -0.5745  | -1.7726  | 1.3814   |
| <b>H7</b>  | -2.9650  | -0.5953  | -0.7427  |
| <b>C8</b>  | -2.3924  | 1.6233   | 2.5625   |
| <b>O9</b>  | -1.7518  | 3.9117   | 2.6097   |
| <b>O10</b> | -3.8172  | 0.7068   | 4.2292   |
| <b>O11</b> | 10.8943  | 3.2522   | -1.2038  |
| <b>H12</b> | 11.1853  | 4.3501   | 0.2683   |
| <b>H13</b> | 9.2597   | 3.9231   | -1.7631  |
| <b>O14</b> | 6.5668   | 4.4106   | 5.9999   |
| <b>H15</b> | 7.4380   | 2.9574   | 6.7671   |
| <b>H16</b> | 5.6238   | 3.5413   | 4.6582   |
| <b>O17</b> | -7.6817  | 1.2302   | -2.5606  |
| <b>H18</b> | -8.0446  | 2.5814   | -1.3493  |
| <b>H19</b> | -7.5570  | -0.2154  | -1.3871  |
| <b>O20</b> | -8.6342  | 4.6695   | 1.2831   |
| <b>H21</b> | -9.1954  | 3.3448   | 2.4529   |
| <b>H22</b> | -7.4795  | 5.5577   | 2.4226   |
| <b>O23</b> | 2.1713   | 6.3495   | 7.8839   |
| <b>H24</b> | 3.8267   | 5.6994   | 7.3567   |
| <b>H25</b> | 2.5417   | 7.0468   | 9.5204   |
| <b>O26</b> | 8.8874   | -0.0699  | 6.9674   |
| <b>H27</b> | 9.0461   | -1.8160  | 7.5154   |
| <b>H28</b> | 9.1217   | -0.2494  | 5.1476   |
| <b>O29</b> | -1.7140  | -3.4790  | 5.9281   |
| <b>H30</b> | -2.5814  | -1.9086  | 5.4197   |
| <b>H31</b> | -2.2790  | -4.6223  | 4.5694   |
| <b>O32</b> | 12.5119  | -4.5183  | 3.3826   |
| <b>H33</b> | 11.5519  | -4.8660  | 4.9360   |
| <b>H34</b> | 14.2296  | -4.7149  | 3.9514   |
| <b>O35</b> | -8.7419  | 0.9808   | 4.9700   |
| <b>H36</b> | -9.0234  | -0.8258  | 5.2062   |
| <b>H37</b> | -6.8937  | 0.9694   | 4.7168   |
| <b>O38</b> | -5.0286  | -4.4484  | 9.7340   |
| <b>H39</b> | -5.3045  | -2.8251  | 10.6014  |

|            |          |          |          |
|------------|----------|----------|----------|
| <b>H40</b> | -3.5565  | -4.0157  | 8.7003   |
| <b>O41</b> | -8.6757  | 7.8669   | -2.8251  |
| <b>H42</b> | -10.3406 | 8.5680   | -2.6740  |
| <b>H43</b> | -8.6190  | 6.7331   | -1.3606  |
| <b>O44</b> | 0.8050   | -10.5787 | 5.9111   |
| <b>H45</b> | 0.6142   | -12.2794 | 6.5233   |
| <b>H46</b> | -0.7861  | -9.8304  | 6.5441   |
| <b>O47</b> | 6.4837   | 4.8018   | -3.2862  |
| <b>H48</b> | 5.3763   | 6.1756   | -2.7250  |
| <b>H49</b> | 7.0921   | 5.4537   | -4.9057  |
| <b>O50</b> | 6.0698   | 0.2797   | -8.9479  |
| <b>H51</b> | 7.7346   | 0.5480   | -8.2203  |
| <b>H52</b> | 5.8090   | -1.5156  | -8.6039  |
| <b>O53</b> | -2.4340  | 3.6850   | 8.2090   |
| <b>H54</b> | -2.5908  | 2.7099   | 6.6348   |
| <b>H55</b> | -0.7918  | 4.5013   | 7.9898   |
| <b>O56</b> | 8.6474   | 6.2588   | -7.8178  |
| <b>H57</b> | 9.9192   | 7.2906   | -8.6115  |
| <b>H58</b> | 7.1148   | 6.8219   | -8.6965  |
| <b>O59</b> | -3.7379  | -9.1878  | 7.8159   |
| <b>H60</b> | -5.2629  | -9.3598  | 6.7898   |
| <b>H61</b> | -4.1895  | -7.7328  | 8.8590   |
| <b>O62</b> | 5.7580   | -4.8320  | -7.5854  |
| <b>H63</b> | 4.5977   | -5.5123  | -6.3174  |
| <b>H64</b> | 5.0512   | -5.6163  | -9.1141  |
| <b>O65</b> | -5.4953  | 0.5102   | 11.0379  |
| <b>H66</b> | -7.0506  | 1.5004   | 10.8678  |
| <b>H67</b> | -4.2859  | 1.6837   | 10.2782  |
| <b>O68</b> | 5.2875   | -0.3572  | -3.1124  |
| <b>H69</b> | 5.9016   | 1.3663   | -3.3467  |
| <b>H70</b> | 6.8106   | -1.3606  | -3.3278  |
| <b>O71</b> | 9.3712   | -0.6595  | 1.8217   |
| <b>H72</b> | 10.1535  | 0.5272   | 0.6331   |
| <b>H73</b> | 10.6845  | -1.9483  | 1.9918   |
| <b>O74</b> | 2.7401   | -6.8087  | -11.2779 |
| <b>H75</b> | 1.2831   | -6.2871  | -10.2574 |
| <b>H76</b> | 1.9578   | -7.5192  | -12.7481 |
| <b>O77</b> | -7.7422  | -2.7930  | 0.5272   |
| <b>H78</b> | -7.6043  | -3.2125  | 2.3206   |
| <b>H79</b> | -8.9800  | -4.0308  | -0.0397  |
| <b>O80</b> | -10.4464 | -2.4434  | -5.2629  |
| <b>H81</b> | -9.5450  | -2.4755  | -6.8692  |
| <b>H82</b> | -9.6981  | -0.9675  | -4.4522  |
| <b>O83</b> | 3.3732   | -3.1483  | 5.2667   |
| <b>H84</b> | 1.5874   | -3.2050  | 5.7901   |

|             |         |         |         |
|-------------|---------|---------|---------|
| <b>H85</b>  | 4.0138  | -4.6941 | 6.0509  |
| <b>O86</b>  | 9.5526  | -5.3120 | 7.6250  |
| <b>H87</b>  | 9.8360  | -5.9356 | 9.3126  |
| <b>H88</b>  | 7.9973  | -6.2248 | 7.1696  |
| <b>O89</b>  | -0.7200 | -0.2891 | -6.3986 |
| <b>H90</b>  | -2.3792 | 0.4857  | -6.6783 |
| <b>H91</b>  | 0.3817  | 0.9392  | -7.2320 |
| <b>O92</b>  | 4.5259  | 1.0696  | 2.5757  |
| <b>H93</b>  | 6.1548  | 0.4365  | 1.9615  |
| <b>H94</b>  | 4.0742  | -0.2872 | 3.7643  |
| <b>O95</b>  | -2.9688 | -6.3438 | 1.8330  |
| <b>H96</b>  | -4.4919 | -7.0090 | 1.0318  |
| <b>H97</b>  | -1.6951 | -7.5306 | 1.2227  |
| <b>O98</b>  | 3.0009  | 8.4849  | -2.0239 |
| <b>H99</b>  | 1.6025  | 7.3907  | -2.5662 |
| <b>H100</b> | 2.7023  | 8.4660  | -0.1814 |
| <b>O101</b> | 9.5526  | -3.3297 | -4.4106 |
| <b>H102</b> | 8.4603  | -4.0459 | -5.7315 |
| <b>H103</b> | 10.2971 | -1.8822 | -5.2856 |
| <b>O104</b> | 10.4653 | 1.5269  | -6.1907 |
| <b>H105</b> | 11.0889 | 2.0163  | -4.5202 |
| <b>H106</b> | 10.0571 | 3.1823  | -6.8994 |
| <b>O107</b> | -5.3366 | 6.5441  | 4.8774  |
| <b>H108</b> | -4.0421 | 5.7561  | 3.7908  |
| <b>H109</b> | -4.7375 | 5.8808  | 6.4912  |
| <b>O110</b> | 2.8705  | 11.6804 | -6.0150 |
| <b>H111</b> | 3.7530  | 13.1582 | -5.4197 |
| <b>H112</b> | 2.9518  | 10.5900 | -4.5013 |
| <b>O113</b> | 10.5655 | 6.1529  | 3.0519  |
| <b>H114</b> | 9.1047  | 5.6956  | 4.0894  |
| <b>H115</b> | 11.3289 | 7.4663  | 4.0440  |
| <b>O116</b> | -5.2950 | 2.0371  | -7.0052 |
| <b>H117</b> | -5.1816 | 3.8909  | -7.0241 |
| <b>H118</b> | -6.1832 | 1.8009  | -5.3838 |
| <b>O119</b> | 1.5741  | 7.5684  | 2.7798  |
| <b>H120</b> | 1.7934  | 7.5400  | 4.6053  |
| <b>H121</b> | 0.2891  | 6.2342  | 2.6135  |
| <b>O122</b> | -4.7583 | 7.0695  | -6.0887 |
| <b>H123</b> | -6.1832 | 7.5362  | -4.9851 |
| <b>H124</b> | -4.1158 | 8.7400  | -6.5933 |
| <b>O125</b> | 9.2956  | -6.3929 | -0.2608 |
| <b>H126</b> | 9.5847  | -5.4065 | -1.8122 |
| <b>H127</b> | 10.6883 | -5.8109 | 0.8088  |
| <b>O128</b> | 4.2765  | -5.2138 | 0.5858  |
| <b>H129</b> | 4.1347  | -4.2632 | 2.1637  |

|             |          |          |          |
|-------------|----------|----------|----------|
| <b>H130</b> | 6.1114   | -5.3763  | 0.3968   |
| <b>O131</b> | -0.7521  | -5.2194  | -7.8027  |
| <b>H132</b> | -0.7540  | -3.4128  | -7.3699  |
| <b>H133</b> | 0.2249   | -5.8808  | -6.3703  |
| <b>O134</b> | -7.3397  | -1.9861  | -9.4902  |
| <b>H135</b> | -6.4742  | -0.5235  | -8.7419  |
| <b>H136</b> | -7.6269  | -1.4173  | -11.1928 |
| <b>O137</b> | -8.0294  | -9.4297  | 4.8150   |
| <b>H138</b> | -7.5816  | -9.3409  | 3.0103   |
| <b>H139</b> | -9.2408  | -10.7847 | 4.8226   |
| <b>O140</b> | -2.2677  | 11.4725  | -7.1961  |
| <b>H141</b> | -2.6777  | 13.2092  | -7.5268  |
| <b>H142</b> | -0.4668  | 11.5519  | -6.8011  |
| <b>O143</b> | 4.2292   | 8.2581   | -9.7208  |
| <b>H144</b> | 3.6944   | 9.5186   | -8.4660  |
| <b>H145</b> | 3.5527   | 8.9630   | -11.2590 |
| <b>O146</b> | -0.3779  | 5.2364   | -4.0969  |
| <b>H147</b> | -2.0107  | 5.8770   | -4.7111  |
| <b>H148</b> | 0.4309   | 4.7319   | -5.6881  |
| <b>O149</b> | 2.2337   | 3.5905   | -8.2562  |
| <b>H150</b> | 2.9234   | 5.1212   | -9.0197  |
| <b>H151</b> | 3.6207   | 2.3886   | -8.6020  |
| <b>O152</b> | -9.6735  | 8.1636   | 7.1772   |
| <b>H153</b> | -9.7907  | 9.9551   | 6.9466   |
| <b>H154</b> | -8.1428  | 7.7346   | 6.2323   |
| <b>O155</b> | -8.1939  | -4.2443  | 5.5690   |
| <b>H156</b> | -8.3583  | -6.0736  | 5.3725   |
| <b>H157</b> | -7.2792  | -4.1820  | 7.1772   |
| <b>O158</b> | -9.4864  | 3.4714   | 9.4883   |
| <b>H159</b> | -9.4902  | 2.6154   | 7.8518   |
| <b>H160</b> | -9.8209  | 5.2119   | 8.9743   |
| <b>O161</b> | -11.2080 | -6.0490  | -1.7442  |
| <b>H162</b> | -12.9994 | -6.3306  | -1.8538  |
| <b>H163</b> | -10.9510 | -4.8623  | -3.1615  |
| <b>O164</b> | 5.2591   | -7.9142  | 6.3363   |
| <b>H165</b> | 3.6585   | -8.8345  | 6.5044   |
| <b>H166</b> | 6.0112   | -8.8893  | 4.9379   |
| <b>O167</b> | -7.1583  | -8.8817  | -0.2098  |
| <b>H168</b> | -8.6398  | -7.9482  | -0.8258  |
| <b>H169</b> | -6.6613  | -9.7245  | -1.7952  |
| <b>O170</b> | -6.2626  | -10.6581 | -4.9284  |
| <b>H171</b> | -6.1492  | -9.2030  | -6.0849  |
| <b>H172</b> | -6.1133  | -12.0413 | -6.0887  |
| <b>O173</b> | 1.1527   | -9.3560  | 0.7521   |
| <b>H174</b> | 2.4491   | -8.0483  | 0.9127   |

|             |         |          |         |
|-------------|---------|----------|---------|
| <b>H175</b> | 1.1338  | -10.0552 | 2.4623  |
| <b>O176</b> | 7.1091  | -10.3425 | 2.2280  |
| <b>H177</b> | 7.9860  | -9.0612  | 1.2113  |
| <b>H178</b> | 6.9032  | -11.6955 | 1.0356  |
| <b>O179</b> | -5.6465 | -6.8219  | -8.2676 |
| <b>H180</b> | -6.4307 | -5.2251  | -8.7513 |
| <b>H181</b> | -3.8645 | -6.3306  | -8.2090 |
| <b>O182</b> | 2.3036  | -6.7047  | -3.9287 |
| <b>H183</b> | 1.6327  | -8.1655  | -3.0368 |
| <b>H184</b> | 3.0387  | -5.7939  | -2.4907 |

Table S26: H-Asp-Ala-Glu-Gly-Ser-OH (polypeptide 1) atomic coordinates. Values in atomic units.

|            | <b>x</b> | <b>y</b> | <b>z</b> |
|------------|----------|----------|----------|
| <b>N1</b>  | -11.3006 | 14.9175  | 2.5303   |
| <b>H2</b>  | -11.9676 | 14.7153  | 0.6916   |
| <b>H3</b>  | -10.8206 | 16.7902  | 2.8705   |
| <b>H4</b>  | -12.7557 | 14.3600  | 3.7473   |
| <b>C5</b>  | -9.1066  | 13.1733  | 2.9763   |
| <b>H6</b>  | -7.8424  | 13.3415  | 1.3738   |
| <b>C7</b>  | -7.7706  | 13.9707  | 5.4878   |
| <b>H8</b>  | -9.0480  | 13.7251  | 7.1356   |
| <b>H9</b>  | -7.1828  | 15.9852  | 5.4027   |
| <b>C10</b> | -5.3819  | 12.4476  | 6.0377   |
| <b>O11</b> | -4.7583  | 11.6161  | 8.0748   |
| <b>O12</b> | -3.9779  | 12.0168  | 3.9098   |
| <b>H13</b> | -2.5360  | 11.0133  | 4.3879   |
| <b>C14</b> | -10.1138 | 10.4804  | 3.0387   |
| <b>O15</b> | -12.3815 | 10.1346  | 3.3618   |
| <b>N16</b> | -8.4754  | 8.5756   | 2.7118   |
| <b>H17</b> | -6.6140  | 8.8307   | 2.4472   |
| <b>C18</b> | -9.1274  | 5.9394   | 2.8743   |
| <b>H19</b> | -10.3954 | 5.6371   | 4.4522   |
| <b>C20</b> | -10.2744 | 4.9379   | 0.3874   |
| <b>H21</b> | -8.9592  | 5.2421   | -1.2208  |
| <b>H22</b> | -12.0678 | 5.9470   | -0.0283  |
| <b>H23</b> | -10.7034 | 2.8856   | 0.5216   |
| <b>C24</b> | -6.6537  | 4.6223   | 3.4506   |
| <b>O25</b> | -4.6506  | 5.7826   | 3.2182   |
| <b>N26</b> | -6.7331  | 2.2242   | 4.2746   |
| <b>H27</b> | -8.3431  | 1.2567   | 4.4522   |
| <b>C28</b> | -4.4919  | 0.7975   | 4.8982   |
| <b>H29</b> | -3.0179  | 1.2208   | 3.5470   |
| <b>C30</b> | -3.5773  | 1.3852   | 7.6307   |



|            |         |          |         |
|------------|---------|----------|---------|
| <b>H31</b> | -5.1571 | 1.0016   | 8.9668  |
| <b>H32</b> | -3.1842 | 3.4544   | 7.7063  |
| <b>C33</b> | -1.1867 | -0.0605  | 8.5038  |
| <b>H34</b> | 0.3704  | 0.2211   | 7.1262  |
| <b>H35</b> | -1.5628 | -2.1184  | 8.6738  |
| <b>C36</b> | -0.2362 | 0.8749   | 11.0625 |
| <b>O37</b> | 1.6384  | 2.1467   | 11.4404 |
| <b>O38</b> | -1.7480 | 0.1512   | 13.0467 |
| <b>H39</b> | -1.0053 | 0.8050   | 14.5585 |
| <b>C40</b> | -5.1816 | -1.9634  | 4.5920  |
| <b>O41</b> | -7.4002 | -2.6343  | 4.7413  |
| <b>N42</b> | -3.3089 | -3.6094  | 4.0931  |
| <b>H43</b> | -1.5080 | -3.0519  | 4.0383  |
| <b>C44</b> | -3.6566 | -6.3306  | 3.9911  |
| <b>H45</b> | -3.8380 | -6.8899  | 2.0371  |
| <b>H46</b> | -5.2232 | -6.8937  | 5.1760  |
| <b>C47</b> | -1.3228 | -7.5343  | 5.0437  |
| <b>O48</b> | 0.3893  | -6.2172  | 5.8978  |
| <b>N49</b> | -1.2000 | -10.0533 | 4.9662  |
| <b>H50</b> | -2.5020 | -11.1928 | 4.1876  |
| <b>C51</b> | 0.9581  | -11.5462 | 5.7070  |
| <b>H52</b> | 2.6437  | -10.8036 | 4.8264  |
| <b>C53</b> | 1.3096  | -11.7862 | 8.6077  |
| <b>H54</b> | -0.4101 | -12.6479 | 9.4581  |
| <b>H55</b> | 1.5798  | -9.8757  | 9.4335  |
| <b>O56</b> | 3.4639  | -13.3056 | 9.1765  |
| <b>H57</b> | 3.3165  | -14.6737 | 7.9274  |
| <b>C58</b> | 0.4649  | -14.2145 | 4.6223  |
| <b>O59</b> | -1.5666 | -14.5887 | 3.4299  |
| <b>O60</b> | 2.1014  | -15.8964 | 5.0361  |

Table S27: H-Thr-Gly-Pro-Tyr-Ser-OH (polypeptide 2) atomic coordinates. Values in atomic units.

|            | <b>x</b> | <b>y</b> | <b>z</b> |
|------------|----------|----------|----------|
| <b>N1</b>  | 24.0581  | -7.1602  | 6.8692   |
| <b>H2</b>  | 25.1900  | -8.1712  | 5.6314   |
| <b>H3</b>  | 23.7709  | -8.1655  | 8.5510   |
| <b>H4</b>  | 24.8820  | -5.4065  | 7.2547   |
| <b>C5</b>  | 21.4503  | -6.6575  | 5.8033   |
| <b>H6</b>  | 21.0138  | -8.1296  | 4.4579   |
| <b>C7</b>  | 19.4510  | -6.6008  | 7.9312   |
| <b>H8</b>  | 19.4113  | -4.7224  | 8.8949   |
| <b>O9</b>  | 20.0084  | -8.4584  | 9.7963   |
| <b>H10</b> | 18.6440  | -8.3942  | 11.0152  |

|            |         |         |         |
|------------|---------|---------|---------|
| <b>C11</b> | 16.8034 | -7.2339 | 6.9202  |
| <b>H12</b> | 16.7808 | -9.0971 | 5.9489  |
| <b>H13</b> | 16.1137 | -5.7618 | 5.5955  |
| <b>H14</b> | 15.4145 | -7.3151 | 8.4962  |
| <b>C15</b> | 21.5467 | -4.1385 | 4.4862  |
| <b>O16</b> | 23.3362 | -2.7250 | 4.9171  |
| <b>N17</b> | 19.6683 | -3.4941 | 2.8799  |
| <b>H18</b> | 18.3152 | -4.7130 | 2.3981  |
| <b>C19</b> | 19.1448 | -0.8712 | 2.1940  |
| <b>H20</b> | 17.8806 | -0.9392 | 0.5934  |
| <b>H21</b> | 20.8985 | 0.1096  | 1.8141  |
| <b>C22</b> | 17.7993 | 0.4932  | 4.3275  |
| <b>O23</b> | 17.7143 | -0.5178 | 6.4251  |
| <b>N24</b> | 16.6806 | 2.7174  | 3.9590  |
| <b>C25</b> | 16.7864 | 4.1536  | 1.5836  |
| <b>H26</b> | 16.8412 | 2.9329  | -0.1247 |
| <b>H27</b> | 18.4796 | 5.3989  | 1.6365  |
| <b>C28</b> | 14.6794 | 3.6510  | 5.6276  |
| <b>H29</b> | 15.4769 | 3.9080  | 7.4909  |
| <b>C30</b> | 13.8536 | 6.1511  | 4.3974  |
| <b>H31</b> | 15.0914 | 7.6969  | 5.1042  |
| <b>H32</b> | 11.8561 | 6.6537  | 4.7923  |
| <b>C33</b> | 14.3657 | 5.7410  | 1.5817  |
| <b>H34</b> | 12.7972 | 4.6128  | 0.7483  |
| <b>H35</b> | 14.5717 | 7.5362  | 0.5197  |
| <b>C36</b> | 12.5157 | 1.7669  | 5.9394  |
| <b>O37</b> | 11.9242 | 0.3779  | 4.1725  |
| <b>N38</b> | 11.3667 | 1.6441  | 8.1957  |
| <b>H39</b> | 11.7824 | 2.8025  | 9.6244  |
| <b>C40</b> | 9.4581  | -0.2154 | 8.7702  |
| <b>H41</b> | 8.1863  | -0.3704 | 7.1753  |
| <b>C42</b> | 10.7318 | -2.8233 | 9.3504  |
| <b>H43</b> | 12.0791 | -2.6229 | 10.9453 |
| <b>H44</b> | 11.7843 | -3.4828 | 7.6591  |
| <b>C45</b> | 8.7721  | -4.7659 | 9.9910  |
| <b>C46</b> | 7.0846  | -5.5690 | 8.1069  |
| <b>H47</b> | 7.3680  | -4.9851 | 6.1718  |
| <b>C48</b> | 4.8660  | -6.8484 | 8.7759  |
| <b>H49</b> | 3.4317  | -7.2206 | 7.3718  |
| <b>C50</b> | 4.3634  | -7.3529 | 11.3176 |
| <b>O51</b> | 1.8689  | -7.8632 | 12.0432 |
| <b>H52</b> | 1.1414  | -6.1681 | 12.2492 |
| <b>C53</b> | 8.3545  | -5.4726 | 12.5157 |
| <b>H54</b> | 9.5960  | -4.7923 | 13.9840 |
| <b>C55</b> | 6.1303  | -6.7425 | 13.1827 |

|            |        |         |         |
|------------|--------|---------|---------|
| <b>H56</b> | 5.6560 | -7.0222 | 15.1480 |
| <b>C57</b> | 7.9217 | 0.8447  | 10.9736 |
| <b>O58</b> | 8.8798 | 2.4472  | 12.3626 |
| <b>N59</b> | 5.5274 | 0.0359  | 11.3081 |
| <b>H60</b> | 4.7073 | -1.3323 | 10.2914 |
| <b>C61</b> | 3.9344 | 0.7937  | 13.4019 |
| <b>H62</b> | 4.9945 | 0.6179  | 15.1386 |
| <b>C63</b> | 2.8535 | 3.5111  | 13.1468 |
| <b>H64</b> | 1.6743 | 3.6377  | 11.4121 |
| <b>H65</b> | 4.4390 | 4.8755  | 12.9786 |
| <b>O66</b> | 1.3701 | 4.1574  | 15.3049 |
| <b>H67</b> | 0.4705 | 2.5681  | 15.6602 |
| <b>C68</b> | 1.6630 | -1.0469 | 13.5663 |
| <b>O69</b> | 1.3606 | -2.6910 | 11.8694 |
| <b>O70</b> | 0.1663 | -0.7710 | 15.3994 |

Table S28: H-His-Ala-Glu-Pro-Tyr-OH (polypeptide 3) atomic coordinates. Values in atomic units.

|            | <b>x</b> | <b>y</b> | <b>z</b> |
|------------|----------|----------|----------|
| <b>N1</b>  | -3.2201  | 3.1369   | -1.6497  |
| <b>H2</b>  | -4.6072  | 2.3036   | -0.5310  |
| <b>H3</b>  | -3.7965  | 3.1596   | -3.5262  |
| <b>H4</b>  | -2.9725  | 4.9851   | -0.9959  |
| <b>C5</b>  | -0.7446  | 1.7782   | -1.3152  |
| <b>H6</b>  | -1.0809  | -0.2343  | -1.4456  |
| <b>C7</b>  | 1.1830   | 2.5927   | -3.4015  |
| <b>H8</b>  | 1.1395   | 4.6846   | -3.6113  |
| <b>H9</b>  | 0.6557   | 1.7612   | -5.2553  |
| <b>N10</b> | 4.9945   | -0.3893  | -3.1729  |
| <b>H11</b> | 4.2179   | -1.9445  | -3.9117  |
| <b>C12</b> | 3.9042   | 1.9578   | -2.8289  |
| <b>C13</b> | 7.4531   | -0.1757  | -2.4737  |
| <b>H14</b> | 8.7986   | -1.7404  | -2.5303  |
| <b>N15</b> | 8.0068   | 2.1335   | -1.7385  |
| <b>C16</b> | 5.7958   | 3.4865   | -1.9823  |
| <b>H17</b> | 5.7656   | 5.4783   | -1.5042  |
| <b>C18</b> | 0.2835   | 2.2941   | 1.3020   |
| <b>O19</b> | -0.4592  | 4.1706   | 2.4377   |
| <b>N20</b> | 1.9502   | 0.6557   | 2.2903   |
| <b>H21</b> | 2.6022   | -0.8731  | 1.3833   |
| <b>C22</b> | 3.2843   | 1.0545   | 4.6260   |
| <b>H23</b> | 3.9533   | 2.9877   | 4.7168   |
| <b>C24</b> | 1.6686   | 0.3742   | 6.9580   |
| <b>H25</b> | 0.9997   | -1.6119  | 6.8503   |

|            |         |         |         |
|------------|---------|---------|---------|
| <b>H26</b> | -0.0094 | 1.6308  | 7.0562  |
| <b>H27</b> | 2.7666  | 0.6161  | 8.7324  |
| <b>C28</b> | 5.5596  | -0.6690 | 4.4409  |
| <b>O29</b> | 5.5293  | -2.4548 | 2.9499  |
| <b>N30</b> | 7.5797  | -0.1512 | 5.8846  |
| <b>H31</b> | 7.6269  | 1.2831  | 7.1073  |
| <b>C32</b> | 9.8852  | -1.6082 | 5.7788  |
| <b>H33</b> | 9.4335  | -3.5395 | 5.2988  |
| <b>C34</b> | 11.6993 | -0.4705 | 3.7738  |
| <b>H35</b> | 11.9884 | 1.5685  | 4.2122  |
| <b>H36</b> | 10.6996 | -0.5650 | 1.9219  |
| <b>C37</b> | 14.2996 | -1.7820 | 3.5300  |
| <b>H38</b> | 14.0463 | -3.8343 | 3.1880  |
| <b>H39</b> | 15.4315 | -1.5269 | 5.2780  |
| <b>C40</b> | 15.8227 | -0.7370 | 1.3152  |
| <b>O41</b> | 16.2649 | -1.8274 | -0.6595 |
| <b>O42</b> | 16.7108 | 1.6705  | 1.7083  |
| <b>H43</b> | 17.6047 | 2.1694  | 0.2230  |
| <b>C44</b> | 11.0492 | -1.5099 | 8.4055  |
| <b>O45</b> | 10.8130 | 0.4687  | 9.6093  |
| <b>N46</b> | 12.2341 | -3.4790 | 9.4278  |
| <b>C47</b> | 12.0262 | -6.0944 | 8.5321  |
| <b>H48</b> | 12.7953 | -6.2833 | 6.5876  |
| <b>H49</b> | 10.0061 | -6.6802 | 8.5812  |
| <b>C50</b> | 13.5531 | -3.3014 | 11.8391 |
| <b>H51</b> | 12.6271 | -1.9823 | 13.0958 |
| <b>C52</b> | 13.4870 | -6.0396 | 12.8180 |
| <b>H53</b> | 11.6577 | -6.3589 | 13.8026 |
| <b>H54</b> | 15.0498 | -6.4761 | 14.1465 |
| <b>C55</b> | 13.5720 | -7.6534 | 10.4143 |
| <b>H56</b> | 15.5619 | -7.7838 | 9.7396  |
| <b>H57</b> | 12.8105 | -9.5828 | 10.7015 |
| <b>C58</b> | 16.2479 | -2.4056 | 11.4158 |
| <b>O59</b> | 17.3401 | -2.8913 | 9.4203  |
| <b>N60</b> | 17.3193 | -1.0469 | 13.2621 |
| <b>H61</b> | 16.5049 | -0.6274 | 14.9137 |
| <b>C62</b> | 19.8761 | -0.1380 | 13.2224 |
| <b>H63</b> | 21.0950 | -1.4929 | 12.2964 |
| <b>C64</b> | 19.9971 | 2.5096  | 11.9506 |
| <b>H65</b> | 19.0069 | 3.9231  | 13.1468 |
| <b>H66</b> | 19.0125 | 2.4075  | 10.0987 |
| <b>C67</b> | 22.6767 | 3.3807  | 11.5198 |
| <b>C68</b> | 23.7331 | 3.3429  | 9.0801  |
| <b>H69</b> | 22.6276 | 2.6248  | 7.5230  |
| <b>C70</b> | 26.2029 | 4.2084  | 8.6644  |

|            |         |         |         |
|------------|---------|---------|---------|
| <b>H71</b> | 27.0099 | 4.1593  | 6.7936  |
| <b>C72</b> | 27.6372 | 5.1230  | 10.6864 |
| <b>O73</b> | 30.1260 | 5.9715  | 10.2744 |
| <b>H74</b> | 30.8195 | 6.3740  | 11.8977 |
| <b>C75</b> | 24.1280 | 4.3388  | 13.5248 |
| <b>H76</b> | 23.3306 | 4.3634  | 15.4069 |
| <b>C77</b> | 26.6036 | 5.1892  | 13.1204 |
| <b>H78</b> | 27.6902 | 5.8808  | 14.7002 |
| <b>C79</b> | 20.5961 | -0.0151 | 16.0551 |
| <b>O80</b> | 19.0295 | 1.0016  | 17.5423 |
| <b>O81</b> | 22.6578 | -0.9675 | 16.7562 |

Table S29: H-Thr-Asp-His-Pro-Ala-OH (polypeptide 4) atomic coordinates. Values in atomic units.

|            | <b>x</b> | <b>y</b> | <b>z</b> |
|------------|----------|----------|----------|
| <b>N1</b>  | -0.5783  | 4.0913   | -2.1600  |
| <b>H2</b>  | -2.4264  | 3.4979   | -2.4151  |
| <b>H3</b>  | 0.1436   | 4.8812   | -3.8286  |
| <b>H4</b>  | -0.4762  | 5.3952   | -0.6784  |
| <b>C5</b>  | 1.1830   | 1.9219   | -1.5345  |
| <b>H6</b>  | 0.2192   | 0.1814   | -1.9974  |
| <b>C7</b>  | 3.6925   | 2.0976   | -3.0236  |
| <b>H8</b>  | 5.1930   | 3.0632   | -1.9011  |
| <b>O9</b>  | 3.4053   | 3.4998   | -5.3045  |
| <b>H10</b> | 5.0777   | 3.5867   | -6.0471  |
| <b>C11</b> | 4.5788   | -0.5556  | -3.8002  |
| <b>H12</b> | 3.1521   | -1.5118  | -5.0078  |
| <b>H13</b> | 4.9738   | -1.7574  | -2.1278  |
| <b>H14</b> | 6.3684   | -0.4233  | -4.8963  |
| <b>C15</b> | 1.6800   | 1.9918   | 1.2718   |
| <b>O16</b> | 0.7672   | 3.7095   | 2.5341   |
| <b>N17</b> | 3.1124   | 0.1795   | 2.3225   |
| <b>H18</b> | 3.8985   | -1.2453  | 1.3530   |
| <b>C19</b> | 3.9174   | 0.2268   | 4.9265   |
| <b>H20</b> | 4.2878   | 2.1637   | 5.4802   |
| <b>C21</b> | 1.9426   | -1.0450  | 6.7066   |
| <b>H22</b> | 1.6271   | -3.0387  | 6.1397   |
| <b>H23</b> | 0.1209   | -0.0170  | 6.5422   |
| <b>C24</b> | 2.6985   | -1.0223  | 9.4883   |
| <b>O25</b> | 2.3659   | -2.7231  | 10.9906  |
| <b>O26</b> | 3.8834   | 1.1716   | 10.2177  |
| <b>H27</b> | 4.3369   | 1.0016   | 11.9657  |
| <b>C28</b> | 6.4175   | -1.1679  | 4.8793   |
| <b>O29</b> | 6.8087   | -2.7855  | 3.2598   |

|            |         |         |         |
|------------|---------|---------|---------|
| <b>N30</b> | 8.1693  | -0.5027 | 6.5876  |
| <b>H31</b> | 7.7970  | 0.7181  | 7.9841  |
| <b>C32</b> | 10.7223 | -1.4702 | 6.5914  |
| <b>H33</b> | 10.7091 | -3.3921 | 5.9016  |
| <b>C34</b> | 12.5251 | 0.2343  | 5.0229  |
| <b>H35</b> | 14.4810 | -0.5310 | 5.0267  |
| <b>H36</b> | 12.6007 | 2.1467  | 5.8941  |
| <b>N37</b> | 12.0224 | -1.1697 | 0.4422  |
| <b>H38</b> | 12.8445 | -2.8592 | 0.6255  |
| <b>C39</b> | 11.6388 | 0.5688  | 2.3414  |
| <b>C40</b> | 11.0247 | -0.1795 | -1.6970 |
| <b>H41</b> | 11.0662 | -1.1508 | -3.5149 |
| <b>N42</b> | 10.0363 | 2.0749  | -1.3096 |
| <b>C43</b> | 10.4559 | 2.5644  | 1.2283  |
| <b>H44</b> | 9.8625  | 4.3426  | 2.0504  |
| <b>C45</b> | 11.5746 | -1.4192 | 9.3220  |
| <b>O46</b> | 10.4785 | 0.0246  | 10.7866 |
| <b>N47</b> | 13.4416 | -2.8913 | 10.1100 |
| <b>C48</b> | 14.3959 | -5.1174 | 8.7589  |
| <b>H49</b> | 15.1254 | -4.5901 | 6.8597  |
| <b>H50</b> | 12.8520 | -6.5328 | 8.5888  |
| <b>C51</b> | 14.7002 | -2.5058 | 12.5232 |
| <b>H52</b> | 13.3906 | -1.8708 | 13.9556 |
| <b>C53</b> | 15.8454 | -5.1249 | 13.0561 |
| <b>H54</b> | 14.3638 | -6.3457 | 13.9103 |
| <b>H55</b> | 17.4913 | -5.0569 | 14.3544 |
| <b>C56</b> | 16.5275 | -6.1435 | 10.4294 |
| <b>H57</b> | 18.3587 | -5.3064 | 9.8171  |
| <b>H58</b> | 16.6693 | -8.2316 | 10.3822 |
| <b>C59</b> | 16.7505 | -0.5197 | 12.2095 |
| <b>O60</b> | 17.4837 | 0.0605  | 10.0760 |
| <b>N61</b> | 17.6293 | 0.5707  | 14.3147 |
| <b>H62</b> | 17.1417 | 0.0850  | 16.0778 |
| <b>C63</b> | 19.6513 | 2.3697  | 14.4281 |
| <b>H64</b> | 21.1668 | 1.7839  | 13.1903 |
| <b>C65</b> | 18.7253 | 5.0645  | 13.8044 |
| <b>H66</b> | 17.1889 | 5.6144  | 15.1216 |
| <b>H67</b> | 18.0015 | 5.1344  | 11.8391 |
| <b>H68</b> | 20.3089 | 6.4270  | 14.0048 |
| <b>C69</b> | 20.6528 | 2.2639  | 17.1776 |
| <b>O70</b> | 19.4264 | 0.9638  | 18.7650 |
| <b>O71</b> | 22.6427 | 3.4582  | 17.6973 |

Table S30: H-Tyr-Ser-Glu-Asp-His-OH (polypeptide 5) atomic coordinates. Values in atomic units.

|            | <b>x</b> | <b>y</b> | <b>z</b> |
|------------|----------|----------|----------|
| <b>N1</b>  | -3.3977  | 2.5587   | -1.5609  |
| <b>H2</b>  | -4.4106  | 0.8863   | -1.3814  |
| <b>H3</b>  | -3.8154  | 3.4261   | -3.2711  |
| <b>H4</b>  | -3.9174  | 3.7398   | -0.0643  |
| <b>C5</b>  | -0.6142  | 2.0768   | -1.3058  |
| <b>H6</b>  | -0.1417  | 0.4157   | -2.4037  |
| <b>C7</b>  | 0.8353   | 4.4427   | -2.3074  |
| <b>H8</b>  | 0.3987   | 6.1416   | -1.1490  |
| <b>H9</b>  | 0.2910   | 4.8623   | -4.2935  |
| <b>C10</b> | 3.6604   | 4.0516   | -2.3111  |
| <b>C11</b> | 4.7791   | 2.4226   | -4.0875  |
| <b>H12</b> | 3.6321   | 1.4438   | -5.4613  |
| <b>C13</b> | 7.4039   | 2.0711   | -4.1177  |
| <b>H14</b> | 8.2694   | 0.8239   | -5.4859  |
| <b>C15</b> | 8.9327   | 3.3505   | -2.3867  |
| <b>O16</b> | 11.5670  | 2.9952   | -2.4604  |
| <b>H17</b> | 12.3116  | 3.9703   | -1.0960  |
| <b>C18</b> | 5.2194   | 5.3385   | -0.5839  |
| <b>H19</b> | 4.4031   | 6.6140   | 0.7842   |
| <b>C20</b> | 7.8461   | 4.9832   | -0.6142  |
| <b>H21</b> | 9.0291   | 5.9810   | 0.7181   |
| <b>C22</b> | -0.0435  | 1.5212   | 1.4551   |
| <b>O23</b> | -1.5628  | 2.2091   | 3.0651   |
| <b>N24</b> | 2.0749   | 0.2570   | 2.0541   |
| <b>H25</b> | 3.3580   | -0.3326  | 0.7861   |
| <b>C26</b> | 2.9347   | -0.0869  | 4.6336   |
| <b>H27</b> | 2.7798   | 1.6819   | 5.6465   |
| <b>C28</b> | 1.5666   | -2.2280  | 6.1019   |
| <b>H29</b> | 1.9294   | -4.0931  | 5.1967   |
| <b>H30</b> | -0.5027  | -1.8538  | 6.0339   |
| <b>O31</b> | 2.3414   | -2.2715  | 8.6871   |
| <b>H32</b> | 1.3965   | -3.5735  | 9.5431   |
| <b>C33</b> | 5.7032   | -0.7105  | 4.3483   |
| <b>O34</b> | 6.4893   | -1.4740  | 2.2998   |
| <b>N35</b> | 7.2433   | -0.3383  | 6.3268   |
| <b>H36</b> | 6.5630   | 0.1493   | 8.0238   |
| <b>C37</b> | 9.9343   | -0.7823  | 6.2153   |
| <b>H38</b> | 10.2707  | -2.5662  | 5.2742   |
| <b>C39</b> | 11.3081  | 1.3946   | 4.7905   |
| <b>H40</b> | 10.8376  | 3.2163   | 5.7296   |
| <b>H41</b> | 10.4691  | 1.4532   | 2.8592   |

|            |         |         |         |
|------------|---------|---------|---------|
| <b>C42</b> | 14.2126 | 1.1376  | 4.5353  |
| <b>H43</b> | 14.6983 | -0.7351 | 3.7247  |
| <b>H44</b> | 15.1480 | 1.3360  | 6.4043  |
| <b>C45</b> | 15.2973 | 3.1672  | 2.7949  |
| <b>O46</b> | 14.1087 | 4.7753  | 1.6516  |
| <b>O47</b> | 17.8693 | 3.0047  | 2.5568  |
| <b>H48</b> | 18.4513 | 4.3955  | 1.5590  |
| <b>C49</b> | 10.8546 | -1.0412 | 8.9119  |
| <b>O50</b> | 9.6282  | -0.1474 | 10.6675 |
| <b>N51</b> | 13.0202 | -2.3017 | 9.3220  |
| <b>H52</b> | 14.0369 | -3.0387 | 7.9161  |
| <b>C53</b> | 14.1257 | -2.6003 | 11.7957 |
| <b>H54</b> | 13.7364 | -0.9316 | 12.9182 |
| <b>C55</b> | 13.0580 | -5.0134 | 13.1279 |
| <b>H56</b> | 13.3131 | -6.6745 | 11.8750 |
| <b>H57</b> | 11.0077 | -4.7489 | 13.4737 |
| <b>C58</b> | 14.3185 | -5.6371 | 15.6469 |
| <b>O59</b> | 15.0101 | -7.7233 | 16.2970 |
| <b>O60</b> | 14.6983 | -3.5395 | 17.1058 |
| <b>H61</b> | 16.3102 | -3.7360 | 17.9940 |
| <b>C62</b> | 16.9697 | -2.7042 | 11.3894 |
| <b>O63</b> | 17.8598 | -3.5376 | 9.4052  |
| <b>N64</b> | 18.4078 | -1.8028 | 13.2697 |
| <b>H65</b> | 17.6444 | -1.2132 | 14.8929 |
| <b>C66</b> | 21.0875 | -2.2091 | 13.5815 |
| <b>H67</b> | 21.7224 | -3.7398 | 12.3872 |
| <b>C68</b> | 22.7013 | 0.2098  | 13.1619 |
| <b>H69</b> | 24.7044 | -0.2589 | 13.5928 |
| <b>H70</b> | 22.0796 | 1.6819  | 14.5244 |
| <b>N71</b> | 21.7337 | 0.0888  | 8.4282  |
| <b>H72</b> | 20.8172 | -1.5779 | 8.4622  |
| <b>C73</b> | 22.6332 | 1.3228  | 10.5352 |
| <b>C74</b> | 21.9435 | 1.7026  | 6.4572  |
| <b>H75</b> | 21.3388 | 1.2302  | 4.5448  |
| <b>N76</b> | 22.9073 | 3.8947  | 7.1469  |
| <b>C77</b> | 23.3419 | 3.6566  | 9.7170  |
| <b>H78</b> | 24.1375 | 5.2156  | 10.7752 |
| <b>C79</b> | 21.4616 | -3.0557 | 16.3594 |
| <b>O80</b> | 19.5813 | -3.0236 | 17.8371 |
| <b>O81</b> | 23.6461 | -3.7095 | 17.0208 |

Table S31: H-Ala-Thr-Ser-Gly-His-OH (polypeptide 6) atomic coordinates. Values in atomic units.

|  | <b>x</b> | <b>y</b> | <b>z</b> |
|--|----------|----------|----------|
|--|----------|----------|----------|



|            |         |         |         |
|------------|---------|---------|---------|
| <b>N1</b>  | -2.9801 | 1.3247  | -2.0050 |
| <b>H2</b>  | -4.1102 | 1.2094  | -0.3912 |
| <b>H3</b>  | -3.9703 | 0.7030  | -3.5810 |
| <b>H4</b>  | -2.4604 | 3.2050  | -2.2412 |
| <b>C5</b>  | -0.6557 | -0.2305 | -1.5685 |
| <b>H6</b>  | -1.1849 | -2.2053 | -1.6648 |
| <b>C7</b>  | 1.3115  | 0.4044  | -3.6358 |
| <b>H8</b>  | 1.9389  | 2.4056  | -3.5224 |
| <b>H9</b>  | 0.5291  | 0.0643  | -5.5558 |
| <b>H10</b> | 3.0160  | -0.8126 | -3.4469 |
| <b>C11</b> | 0.3477  | 0.2343  | 1.0734  |
| <b>O12</b> | -0.9260 | 1.4778  | 2.5644  |
| <b>N13</b> | 2.5851  | -0.7672 | 1.7348  |
| <b>H14</b> | 3.7001  | -1.7404 | 0.5537  |
| <b>C15</b> | 3.6132  | -0.5877 | 4.2802  |
| <b>H16</b> | 3.1710  | 1.2416  | 5.0739  |
| <b>C17</b> | 2.7552  | -2.7193 | 6.0490  |
| <b>H18</b> | 3.6717  | -4.5448 | 5.5274  |
| <b>O19</b> | 0.1077  | -3.1199 | 5.8487  |
| <b>H20</b> | -0.6709 | -1.5156 | 6.2096  |
| <b>C21</b> | 3.2995  | -2.1070 | 8.8326  |
| <b>H22</b> | 2.4377  | -0.2797 | 9.3900  |
| <b>H23</b> | 5.3593  | -2.0277 | 9.2162  |
| <b>H24</b> | 2.4963  | -3.6094 | 10.0647 |
| <b>C25</b> | 6.4307  | -0.7597 | 3.8909  |
| <b>O26</b> | 7.2660  | -1.7971 | 1.9899  |
| <b>N27</b> | 7.9614  | 0.2986  | 5.6125  |
| <b>H28</b> | 7.3246  | 1.1433  | 7.1791  |
| <b>C29</b> | 10.6940 | 0.1209  | 5.5104  |
| <b>H30</b> | 11.2306 | -1.7990 | 5.0569  |
| <b>C31</b> | 11.9393 | 1.9993  | 3.6264  |
| <b>H32</b> | 11.5878 | 3.9835  | 4.2330  |
| <b>H33</b> | 11.0417 | 1.7197  | 1.7442  |
| <b>O34</b> | 14.5906 | 1.5439  | 3.3845  |
| <b>H35</b> | 15.2520 | 2.7212  | 2.1618  |
| <b>C36</b> | 11.5406 | 0.6727  | 8.1806  |
| <b>O37</b> | 10.0174 | 1.5250  | 9.7170  |
| <b>N38</b> | 13.9367 | 0.1436  | 8.8212  |
| <b>H39</b> | 15.1651 | -0.4857 | 7.5249  |
| <b>C40</b> | 14.9118 | 0.4687  | 11.3629 |
| <b>H41</b> | 13.7837 | -0.6368 | 12.6593 |
| <b>H42</b> | 14.9666 | 2.4642  | 11.7938 |
| <b>C43</b> | 17.5574 | -0.5253 | 11.4744 |
| <b>O44</b> | 18.4362 | -1.7499 | 9.7019  |
| <b>N45</b> | 18.8859 | 0.0113  | 13.5588 |

|            |         |         |         |
|------------|---------|---------|---------|
| <b>H46</b> | 18.1319 | 0.8069  | 15.0989 |
| <b>C47</b> | 21.3539 | -0.9751 | 14.1805 |
| <b>H48</b> | 21.6827 | -2.7477 | 13.2186 |
| <b>C49</b> | 23.5668 | 0.9241  | 13.7704 |
| <b>H50</b> | 25.3129 | 0.0661  | 14.5698 |
| <b>H51</b> | 23.1548 | 2.6683  | 14.8646 |
| <b>N52</b> | 23.1057 | 0.5990  | 8.9630  |
| <b>H53</b> | 21.6600 | -0.6425 | 8.9913  |
| <b>C54</b> | 24.1658 | 1.6724  | 11.0832 |
| <b>C55</b> | 24.1148 | 1.7763  | 6.9315  |
| <b>H56</b> | 23.5876 | 1.3247  | 4.9889  |
| <b>N57</b> | 25.7494 | 3.5338  | 7.5910  |
| <b>C58</b> | 25.7834 | 3.4695  | 10.2083 |
| <b>H59</b> | 26.9947 | 4.7451  | 11.2533 |
| <b>C60</b> | 21.2500 | -1.5269 | 17.0453 |
| <b>O61</b> | 19.4510 | -0.5877 | 18.3058 |
| <b>O62</b> | 22.9904 | -2.8440 | 17.9883 |

Table S32: H-Glu-Pro-Asp-Tyr-Thr-OH (polypeptide 7) atomic coordinates. Values in atomic units.

|            | <b>x</b> | <b>y</b> | <b>z</b> |
|------------|----------|----------|----------|
| <b>N1</b>  | 0.5612   | 4.4975   | -2.9177  |
| <b>H2</b>  | -1.1452  | 5.1495   | -3.6302  |
| <b>H3</b>  | 2.0371   | 4.9549   | -4.1328  |
| <b>H4</b>  | 0.9335   | 5.3328   | -1.1546  |
| <b>C5</b>  | 0.5480   | 1.6932   | -2.4377  |
| <b>H6</b>  | -1.3738  | 1.0318   | -2.6645  |
| <b>C7</b>  | 2.3508   | 0.4516   | -4.4295  |
| <b>H8</b>  | 2.3489   | 1.5571   | -6.2210  |
| <b>H9</b>  | 1.5250   | -1.4192  | -4.9454  |
| <b>C10</b> | 5.1023   | -0.0586  | -3.5602  |
| <b>H11</b> | 5.1533   | -1.6006  | -2.1354  |
| <b>H12</b> | 5.9772   | 1.6460   | -2.7061  |
| <b>C13</b> | 6.7822   | -0.9279  | -5.7448  |
| <b>O14</b> | 7.4380   | -3.0784  | -6.1945  |
| <b>O15</b> | 7.4701   | 1.0299   | -7.2981  |
| <b>H16</b> | 8.5548   | 0.3458   | -8.5794  |
| <b>C17</b> | 1.3039   | 1.3701   | 0.3288   |
| <b>O18</b> | 1.9294   | 3.3202   | 1.4419   |
| <b>N19</b> | 1.2094   | -0.8107  | 1.5949   |
| <b>C20</b> | 0.2797   | -3.2106  | 0.5575   |
| <b>H21</b> | 0.7408   | -3.4771  | -1.4702  |
| <b>H22</b> | -1.8009  | -3.3127  | 0.8523   |
| <b>C23</b> | 2.3622   | -1.1603  | 4.0950   |

|            |         |         |         |
|------------|---------|---------|---------|
| <b>H24</b> | 1.4532  | 0.1266  | 5.3952  |
| <b>C25</b> | 1.8330  | -3.9476 | 4.7281  |
| <b>H26</b> | -0.0170 | -4.0818 | 5.7259  |
| <b>H27</b> | 3.3014  | -4.8339 | 5.9356  |
| <b>C28</b> | 1.6044  | -5.2270 | 2.1448  |
| <b>H29</b> | 3.5300  | -5.5785 | 1.3701  |
| <b>H30</b> | 0.5480  | -7.0336 | 2.2223  |
| <b>C31</b> | 5.1703  | -0.5140 | 4.1914  |
| <b>O32</b> | 6.4534  | -0.6104 | 2.2601  |
| <b>N33</b> | 6.1511  | 0.1909  | 6.4213  |
| <b>H34</b> | 5.1325  | 0.2494  | 8.0087  |
| <b>C35</b> | 8.7797  | 0.8353  | 6.7407  |
| <b>H36</b> | 9.9173  | -0.4913 | 5.6730  |
| <b>C37</b> | 9.2691  | 3.6150  | 5.8789  |
| <b>H38</b> | 8.1315  | 4.9360  | 7.0430  |
| <b>H39</b> | 8.6512  | 3.8116  | 3.8834  |
| <b>C40</b> | 12.0205 | 4.4673  | 6.0037  |
| <b>O41</b> | 12.7443 | 6.5857  | 6.5044  |
| <b>O42</b> | 13.7308 | 2.5814  | 5.4783  |
| <b>H43</b> | 15.3937 | 3.2730  | 5.6881  |
| <b>C44</b> | 9.3409  | 0.4271  | 9.5280  |
| <b>O45</b> | 7.6232  | 0.4573  | 11.0908 |
| <b>N46</b> | 11.7522 | -0.0057 | 10.1837 |
| <b>H47</b> | 13.1412 | -0.0057 | 8.9006  |
| <b>C48</b> | 12.5931 | -0.3704 | 12.7500 |
| <b>H49</b> | 11.6785 | 1.0261  | 13.9292 |
| <b>C50</b> | 11.9620 | -3.0992 | 13.7137 |
| <b>H51</b> | 12.8539 | -4.5316 | 12.4665 |
| <b>H52</b> | 9.8852  | -3.3939 | 13.6930 |
| <b>C53</b> | 12.8747 | -3.4431 | 16.3764 |
| <b>C54</b> | 11.7957 | -1.9880 | 18.3190 |
| <b>H55</b> | 10.1327 | -0.8674 | 17.9411 |
| <b>C56</b> | 13.0486 | -1.7310 | 20.6377 |
| <b>H57</b> | 12.3701 | -0.4082 | 22.0361 |
| <b>C58</b> | 15.3540 | -2.9574 | 21.0194 |
| <b>O59</b> | 16.9490 | -2.1354 | 22.9696 |
| <b>H60</b> | 18.1225 | -0.9789 | 22.1136 |
| <b>C61</b> | 15.0706 | -4.8528 | 16.8677 |
| <b>H62</b> | 15.9663 | -5.9111 | 15.3691 |
| <b>C63</b> | 16.3272 | -4.5826 | 19.1807 |
| <b>H64</b> | 18.1773 | -5.4084 | 19.4453 |
| <b>C65</b> | 15.4183 | 0.2646  | 12.7330 |
| <b>O66</b> | 16.5597 | 0.4214  | 10.7091 |
| <b>N67</b> | 16.5880 | 0.7634  | 14.9345 |
| <b>H68</b> | 15.7206 | 0.6727  | 16.6088 |

|            |         |         |         |
|------------|---------|---------|---------|
| <b>C69</b> | 19.2941 | 1.1565  | 15.2161 |
| <b>H70</b> | 20.3032 | -0.1531 | 14.0199 |
| <b>C71</b> | 20.1653 | 3.8494  | 14.6794 |
| <b>H72</b> | 19.1184 | 5.1949  | 15.9172 |
| <b>O73</b> | 19.6909 | 4.4730  | 12.1075 |
| <b>H74</b> | 18.5647 | 3.1483  | 11.5273 |
| <b>C75</b> | 23.0244 | 4.1461  | 15.1008 |
| <b>H76</b> | 24.0770 | 2.7684  | 13.9216 |
| <b>H77</b> | 23.5139 | 3.8097  | 17.1134 |
| <b>H78</b> | 23.6348 | 6.0849  | 14.5830 |
| <b>C79</b> | 19.9272 | 0.4781  | 17.9751 |
| <b>O80</b> | 18.7442 | 1.5874  | 19.7212 |
| <b>O81</b> | 21.5448 | -1.2151 | 18.3814 |

Table S33: MAGE-1 fragment (polypeptide 8) atomic coordinates. Values in atomic units.

|            | <b>x</b> | <b>y</b> | <b>z</b> |
|------------|----------|----------|----------|
| <b>N1</b>  | -25.1674 | 10.7280  | 13.9235  |
| <b>H2</b>  | -25.3809 | 12.6442  | 13.5474  |
| <b>H3</b>  | -26.8454 | 9.7737   | 13.5645  |
| <b>H4</b>  | -23.7387 | 10.0458  | 12.7424  |
| <b>C5</b>  | -24.3094 | 10.3330  | 16.6012  |
| <b>H6</b>  | -25.4962 | 11.4593  | 17.8277  |
| <b>C7</b>  | -24.6023 | 7.4814   | 17.3193  |
| <b>H8</b>  | -23.8389 | 6.2966   | 15.7490  |
| <b>H9</b>  | -26.6603 | 7.0581   | 17.4875  |
| <b>C10</b> | -23.2436 | 6.5876   | 19.7665  |
| <b>H11</b> | -23.8502 | 7.7252   | 21.4238  |
| <b>H12</b> | -21.1574 | 6.7482   | 19.5776  |
| <b>C13</b> | -23.7803 | 3.8078   | 20.3637  |
| <b>O14</b> | -22.2969 | 2.0711   | 20.1672  |
| <b>O15</b> | -26.2181 | 3.4034   | 21.1366  |
| <b>H16</b> | -26.3900 | 1.6422   | 21.5221  |
| <b>C17</b> | -21.6336 | 11.3081  | 16.9112  |
| <b>O18</b> | -20.3221 | 11.5689  | 15.0214  |
| <b>N19</b> | -20.7927 | 11.9091  | 19.2317  |
| <b>H20</b> | -21.8074 | 11.6766  | 20.8078  |
| <b>C21</b> | -18.2264 | 12.6725  | 19.7457  |
| <b>H22</b> | -16.9584 | 11.8883  | 18.3436  |
| <b>C23</b> | -17.9732 | 15.5732  | 19.8629  |
| <b>H24</b> | -19.2506 | 16.3820  | 21.3218  |
| <b>H25</b> | -18.4891 | 16.4066  | 18.0053  |
| <b>H26</b> | -16.0022 | 16.1477  | 20.3032  |
| <b>C27</b> | -17.5688 | 11.4952  | 22.2704  |

|            |          |         |         |
|------------|----------|---------|---------|
| <b>O28</b> | -19.2544 | 10.6543 | 23.6310 |
| <b>N29</b> | -15.1197 | 11.3346 | 22.9224 |
| <b>H30</b> | -13.7383 | 12.0205 | 21.8339 |
| <b>C31</b> | -14.2826 | 10.2196 | 25.2675 |
| <b>H32</b> | -15.7452 | 10.4710 | 26.6735 |
| <b>C33</b> | -13.7024 | 7.3680  | 24.8272 |
| <b>H34</b> | -12.0829 | 7.1469  | 23.5120 |
| <b>H35</b> | -15.3805 | 6.4761  | 23.9353 |
| <b>C36</b> | -13.0864 | 5.9904  | 27.2687 |
| <b>O37</b> | -11.1645 | 6.2550  | 28.5084 |
| <b>O38</b> | -14.9534 | 4.3785  | 28.0624 |
| <b>H39</b> | -14.4111 | 3.5338  | 29.5667 |
| <b>C40</b> | -11.9261 | 11.7087 | 26.0215 |
| <b>O41</b> | -10.4483 | 12.2927 | 24.3246 |
| <b>N42</b> | -11.4480 | 12.4212 | 28.3912 |
| <b>C43</b> | -13.1865 | 12.0924 | 30.5247 |
| <b>H44</b> | -13.8007 | 10.0949 | 30.7307 |
| <b>H45</b> | -14.8551 | 13.3434 | 30.2432 |
| <b>C46</b> | -9.2030  | 13.8857 | 29.0810 |
| <b>H47</b> | -8.8666  | 15.3408 | 27.6883 |
| <b>C48</b> | -9.9248  | 14.9610 | 31.6888 |
| <b>H49</b> | -11.0152 | 16.7373 | 31.4054 |
| <b>H50</b> | -8.2751  | 15.3880 | 32.9096 |
| <b>C51</b> | -11.6691 | 12.9522 | 32.8245 |
| <b>H52</b> | -10.5182 | 11.3516 | 33.5559 |
| <b>H53</b> | -12.8766 | 13.7024 | 34.3647 |
| <b>C54</b> | -6.7973  | 12.3116 | 29.2473 |
| <b>O55</b> | -4.8453  | 13.3377 | 29.9805 |
| <b>N56</b> | -6.8125  | 9.8549  | 28.5745 |
| <b>H57</b> | -8.3998  | 9.0329  | 27.9887 |
| <b>C58</b> | -4.5637  | 8.2676  | 28.7749 |
| <b>H59</b> | -3.5130  | 8.8439  | 30.4303 |
| <b>C60</b> | -5.0947  | 5.4481  | 29.0829 |
| <b>H61</b> | -5.9148  | 4.6279  | 27.3217 |
| <b>O62</b> | -6.8503  | 5.0399  | 31.0709 |
| <b>H63</b> | -8.4716  | 5.5860  | 30.4114 |
| <b>C64</b> | -2.6664  | 4.0176  | 29.7953 |
| <b>H65</b> | -1.8482  | 4.8018  | 31.5622 |
| <b>H66</b> | -1.2264  | 4.1404  | 28.2741 |
| <b>H67</b> | -3.0992  | 1.9899  | 30.1203 |
| <b>C68</b> | -2.8705  | 8.6285  | 26.4958 |
| <b>O69</b> | -3.0935  | 7.3284  | 24.5834 |
| <b>N70</b> | -1.1130  | 10.4710 | 26.6546 |
| <b>H71</b> | -1.1679  | 11.6180 | 28.1531 |
| <b>C72</b> | 0.9108   | 10.8451 | 24.8178 |

|             |         |         |         |
|-------------|---------|---------|---------|
| <b>H73</b>  | 2.0995  | 12.3456 | 25.5245 |
| <b>H74</b>  | 0.0340  | 11.2949 | 23.0282 |
| <b>C75</b>  | 2.5946  | 8.5718  | 24.4172 |
| <b>O76</b>  | 3.1048  | 7.1110  | 26.1444 |
| <b>N77</b>  | 3.5773  | 8.2505  | 22.1022 |
| <b>H78</b>  | 3.2352  | 9.4392  | 20.6812 |
| <b>C79</b>  | 5.1949  | 6.1359  | 21.5013 |
| <b>H80</b>  | 6.4326  | 5.7637  | 23.0868 |
| <b>C81</b>  | 3.6358  | 3.7209  | 20.8871 |
| <b>H82</b>  | 2.1297  | 4.2462  | 19.5190 |
| <b>H83</b>  | 2.6796  | 3.0746  | 22.6427 |
| <b>N84</b>  | 7.0090  | 0.2627  | 21.0024 |
| <b>H85</b>  | 7.6439  | 0.5707  | 22.7542 |
| <b>C86</b>  | 5.1117  | 1.5571  | 19.7684 |
| <b>C87</b>  | 7.8820  | -1.5137 | 19.3754 |
| <b>H88</b>  | 9.4486  | -2.7836 | 19.8138 |
| <b>N89</b>  | 6.6537  | -1.4721 | 17.2116 |
| <b>C90</b>  | 4.9095  | 0.4535  | 17.4535 |
| <b>H91</b>  | 3.6472  | 0.8976  | 15.9039 |
| <b>C92</b>  | 6.8748  | 6.8597  | 19.3054 |
| <b>O93</b>  | 6.1907  | 8.4490  | 17.7596 |
| <b>N94</b>  | 9.1387  | 5.7240  | 19.1675 |
| <b>H95</b>  | 9.6754  | 4.3917  | 20.3958 |
| <b>C96</b>  | 10.9245 | 6.0263  | 17.1228 |
| <b>H97</b>  | 9.9456  | 5.8789  | 15.3370 |
| <b>C98</b>  | 12.5157 | 8.5038  | 17.2551 |
| <b>H99</b>  | 13.7459 | 8.5208  | 18.9615 |
| <b>H100</b> | 11.1702 | 10.1119 | 17.4195 |
| <b>O101</b> | 14.0048 | 8.9138  | 15.0347 |
| <b>H102</b> | 15.6394 | 8.0219  | 15.2388 |
| <b>C103</b> | 12.6631 | 3.7889  | 17.4119 |
| <b>O104</b> | 12.5705 | 2.4774  | 19.3357 |
| <b>N105</b> | 14.2712 | 3.3505  | 15.5109 |
| <b>H106</b> | 14.2580 | 4.4711  | 14.0029 |
| <b>C107</b> | 16.6598 | 2.0825  | 15.8529 |
| <b>H108</b> | 16.5956 | 0.8371  | 17.4743 |
| <b>C109</b> | 17.3552 | 0.6142  | 13.4057 |
| <b>H110</b> | 17.7615 | 1.9672  | 11.8505 |
| <b>H111</b> | 15.7112 | -0.5631 | 12.8426 |
| <b>C112</b> | 19.6210 | -1.0828 | 13.7553 |
| <b>C113</b> | 22.0777 | -0.0775 | 13.7685 |
| <b>H114</b> | 22.3290 | 1.9464  | 13.6155 |
| <b>C115</b> | 24.1885 | -1.6535 | 14.0463 |
| <b>H116</b> | 26.0518 | -0.8296 | 14.0898 |
| <b>C117</b> | 23.8559 | -4.2670 | 14.2769 |

|             |         |         |         |
|-------------|---------|---------|---------|
| <b>O118</b> | 25.9686 | -5.8600 | 14.5622 |
| <b>H119</b> | 27.4218 | -4.7867 | 14.6983 |
| <b>C120</b> | 19.3168 | -3.7152 | 13.9689 |
| <b>H121</b> | 17.4403 | -4.5146 | 13.9424 |
| <b>C122</b> | 21.4238 | -5.3007 | 14.2315 |
| <b>H123</b> | 21.1801 | -7.3189 | 14.4111 |
| <b>C124</b> | 18.5647 | 4.2519  | 16.3990 |
| <b>O125</b> | 18.3152 | 6.2833  | 15.1632 |
| <b>O126</b> | 20.2144 | 3.9306  | 18.0771 |

## 2. Molecular dipole moments

Table S34: aminoacids molecular dipole moments obtained using the database. Values in atomic units.

|            | $\mu_x$ | $\mu_y$ | $\mu_z$ | $ \mu $ |
|------------|---------|---------|---------|---------|
| <b>Gly</b> | 3.01    | -0.96   | -4.19   | 5.25    |
| <b>Ala</b> | -3.41   | -0.08   | -3.39   | 4.81    |
| <b>Asp</b> | -5.15   | 0.26    | -1.44   | 5.35    |
| <b>Glu</b> | -3.50   | -0.34   | -3.24   | 4.78    |
| <b>His</b> | -1.21   | -1.99   | -3.52   | 4.22    |
| <b>Ser</b> | -4.28   | -0.57   | -2.24   | 4.86    |
| <b>Thr</b> | -2.47   | -0.04   | -3.58   | 4.35    |
| <b>Tyr</b> | -4.95   | -0.83   | -2.16   | 5.47    |

Table S35: aminoacids molecular dipole moments obtained by quantum calculations (M06-HF/aug-cc-pVDZ). Values in atomic units.

|            | $\mu_x$ | $\mu_y$ | $\mu_z$ | $ \mu $ |
|------------|---------|---------|---------|---------|
| <b>Gly</b> | 2.78    | -1.42   | -3.85   | 4.96    |
| <b>Ala</b> | -2.56   | -0.14   | -3.36   | 4.23    |
| <b>Asp</b> | -3.81   | 0.16    | -1.34   | 4.04    |
| <b>Glu</b> | -2.22   | -0.38   | -2.92   | 3.68    |
| <b>His</b> | -0.46   | -1.43   | -3.27   | 3.60    |
| <b>Ser</b> | -3.15   | -0.09   | -2.53   | 4.04    |
| <b>Thr</b> | -1.59   | -0.02   | -3.32   | 3.69    |
| <b>Tyr</b> | -2.10   | -0.13   | -2.72   | 3.44    |

Table S36: dipeptides molecular dipole moments obtained using the database. Values in atomic units.

|                | $\mu_x$ | $\mu_y$ | $\mu_z$ | $ \mu $ |
|----------------|---------|---------|---------|---------|
| <b>Ala-Ala</b> | -0.32   | 0.60    | -3.22   | 3.29    |
| <b>Asp-Asp</b> | -7.48   | -1.31   | -7.15   | 10.43   |
| <b>Glu-Glu</b> | -8.05   | 0.63    | -3.10   | 8.65    |
| <b>His-His</b> | -2.47   | 1.17    | -1.63   | 3.18    |

|                |       |       |       |       |
|----------------|-------|-------|-------|-------|
| <b>Ser-Ser</b> | -6.59 | -0.20 | -5.23 | 8.42  |
| <b>Thr-Thr</b> | -5.82 | -0.07 | -5.43 | 7.96  |
| <b>Tyr-Tyr</b> | -9.51 | 0.61  | -6.81 | 11.71 |
| <b>Gly-Gly</b> | -7.99 | 0.30  | -5.37 | 9.63  |

Table S37: dipeptides molecular dipole moments obtained by quantum calculations (M06-HF /aug-cc-pVDZ). Values in atomic units.

|                | $\mu_x$ | $\mu_y$ | $\mu_z$ | $ \mu $ |
|----------------|---------|---------|---------|---------|
| <b>Ala-Ala</b> | -0.81   | -0.31   | -2.86   | 2.99    |
| <b>Asp-Asp</b> | -6.16   | -0.87   | -6.48   | 8.98    |
| <b>Glu-Glu</b> | -7.06   | 1.20    | -2.55   | 7.60    |
| <b>His-His</b> | -2.24   | 0.39    | -1.28   | 2.61    |
| <b>Ser-Ser</b> | -5.83   | -0.34   | -4.73   | 7.52    |
| <b>Thr-Thr</b> | -5.00   | 0.12    | -5.24   | 7.25    |
| <b>Tyr-Tyr</b> | -6.75   | 0.37    | -4.07   | 7.89    |
| <b>Gly-Gly</b> | -7.41   | 0.13    | -4.67   | 8.77    |

Table S38: tripeptides molecular dipole moments obtained using the database. Values in atomic units.

|                    | $\mu_x$ | $\mu_y$ | $\mu_z$ | $ \mu $ |
|--------------------|---------|---------|---------|---------|
| <b>Ala-Ala-Ala</b> | -10.27  | 0.68    | -8.34   | 13.25   |
| <b>Asp-Asp-Asp</b> | -10.42  | -1.48   | -6.50   | 12.36   |
| <b>Glu-Glu-Glu</b> | -11.03  | -0.77   | -7.83   | 13.55   |
| <b>His-His-His</b> | -12.20  | 1.10    | -9.47   | 15.48   |
| <b>Ser-Ser-Ser</b> | -9.45   | 0.49    | -6.16   | 11.29   |
| <b>Thr-Thr-Thr</b> | -9.37   | 0.14    | -7.99   | 12.32   |
| <b>Tyr-Tyr-Tyr</b> | -14.52  | -1.39   | -9.32   | 17.31   |
| <b>Gly-Gly-Gly</b> | -11.46  | -0.11   | -9.16   | 14.67   |

Table S39: tripeptides molecular dipole moments obtained by quantum calculations (M06-HF /aug-cc-pVDZ). Values in atomic units.

|                    | $\mu_x$ | $\mu_y$ | $\mu_z$ | $ \mu $ |
|--------------------|---------|---------|---------|---------|
| <b>Ala-Ala-Ala</b> | -10.49  | 0.98    | -9.10   | 13.92   |
| <b>Asp-Asp-Asp</b> | -9.40   | -2.29   | -6.50   | 11.66   |
| <b>Glu-Glu-Glu</b> | -9.98   | -0.72   | -7.66   | 12.61   |
| <b>His-His-His</b> | -11.47  | 1.00    | -9.88   | 15.18   |
| <b>Ser-Ser-Ser</b> | -10.30  | -0.06   | -8.46   | 13.33   |
| <b>Thr-Thr-Thr</b> | -9.24   | -0.17   | -8.09   | 12.28   |
| <b>Tyr-Tyr-Tyr</b> | -9.00   | -0.18   | -9.22   | 12.89   |
| <b>Gly-Gly-Gly</b> | -11.08  | 0.00    | -9.33   | 14.48   |



Table S40: polypeptides molecular dipole moments obtained using the database. Values in atomic units.

|          | $\mu_x$ | $\mu_y$ | $\mu_z$ | $ \mu $ |
|----------|---------|---------|---------|---------|
| <b>1</b> | -10.11  | 21.40   | -3.86   | 23.99   |
| <b>2</b> | 16.11   | -2.78   | -6.52   | 17.60   |
| <b>3</b> | -20.22  | -0.84   | -12.60  | 23.84   |
| <b>4</b> | -12.91  | -1.23   | -14.99  | 19.82   |
| <b>5</b> | -19.71  | 3.81    | -14.38  | 24.70   |
| <b>6</b> | -18.61  | 2.32    | -13.48  | 23.10   |
| <b>7</b> | -16.88  | 1.52    | -17.07  | 24.05   |
| <b>8</b> | -36.40  | 6.90    | 0.86    | 37.06   |

Table S41: polypeptides molecular dipole moments obtained by quantum calculations (M06-HF/aug-cc-pVDZ). Values in atomic units.

|          | $\mu_x$ | $\mu_y$ | $\mu_z$ | $ \mu $ |
|----------|---------|---------|---------|---------|
| <b>1</b> | -9.75   | 23.26   | -3.33   | 25.44   |
| <b>2</b> | 16.20   | -3.39   | -7.33   | 18.11   |
| <b>3</b> | -20.57  | 0.33    | -13.76  | 24.75   |
| <b>4</b> | -14.24  | -1.43   | -15.37  | 21.00   |
| <b>5</b> | -18.58  | 3.67    | -13.78  | 23.42   |
| <b>6</b> | -20.19  | 1.99    | -15.52  | 25.54   |
| <b>7</b> | -16.71  | 0.79    | -17.40  | 24.14   |
| <b>8</b> | -40.88  | 7.24    | 0.79    | 41.53   |

### 3. Molecular polarizabilities

Table S42: aminoacids molecular polarizabilities obtained using the database. Values in atomic units.

|            | $\alpha_{xx}$ | $\alpha_{yy}$ | $\alpha_{zz}$ | $\alpha_{xy}$ | $\alpha_{xz}$ | $\alpha_{yz}$ | $\alpha_{iso}$ | $\alpha_{11}$ | $\alpha_{22}$ | $\alpha_{33}$ | $\Delta\alpha$ |
|------------|---------------|---------------|---------------|---------------|---------------|---------------|----------------|---------------|---------------|---------------|----------------|
| <b>Gly</b> | 43.7          | 42.0          | 47.7          | 4.0           | -11.8         | 0.4           | 44.5           | 32.5          | 42.8          | 58.0          | 22.2           |
| <b>Ala</b> | 66.0          | 45.6          | 57.5          | 3.2           | 4.1           | -3.1          | 56.4           | 44.1          | 57.3          | 67.8          | 20.6           |
| <b>Asp</b> | 86.4          | 59.0          | 78.9          | 1.8           | 3.7           | -7.8          | 74.7           | 56.0          | 80.3          | 88.0          | 28.9           |
| <b>Glu</b> | 102.6         | 78.2          | 82.4          | 0.8           | 2.2           | -10.6         | 87.8           | 69.4          | 91.1          | 102.9         | 29.4           |
| <b>His</b> | 91.1          | 99.5          | 112.2         | -3.5          | -3.8          | 15.1          | 100.9          | 89.0          | 90.8          | 123.0         | 33.2           |
| <b>Ser</b> | 74.7          | 50.2          | 60.2          | 3.1           | 4.4           | -2.3          | 61.7           | 49.1          | 59.9          | 76.2          | 23.6           |
| <b>Thr</b> | 83.7          | 59.2          | 76.6          | 4.4           | 4.0           | -1.4          | 73.2           | 58.2          | 75.3          | 86.0          | 24.2           |
| <b>Tyr</b> | 166.7         | 94.6          | 125.7         | 6.1           | -5.5          | 11.0          | 129.0          | 90.4          | 128.9         | 167.7         | 66.9           |

Table S43: aminoacids molecular polarizabilities obtained by quantum calculations (M06-HF/aug-cc-pVDZ). Values in atomic units.

|            | $\alpha_{xx}$ | $\alpha_{yy}$ | $\alpha_{zz}$ | $\alpha_{xy}$ | $\alpha_{xz}$ | $\alpha_{yz}$ | $\alpha_{iso}$ | $\alpha_{11}$ | $\alpha_{22}$ | $\alpha_{33}$ | $\Delta\alpha$ |
|------------|---------------|---------------|---------------|---------------|---------------|---------------|----------------|---------------|---------------|---------------|----------------|
| <b>Gly</b> | 42.4          | 45.6          | 46.2          | 3.1           | -9.0          | 0.3           | 44.8           | 34.6          | 45.8          | 53.9          | 16.8           |
| <b>Ala</b> | 61.8          | 46.5          | 59.2          | 1.1           | 1.7           | -2.1          | 55.9           | 46.1          | 58.8          | 62.6          | 15.0           |
| <b>Asp</b> | 81.7          | 58.3          | 77.3          | 3.0           | -4.3          | -8.9          | 72.4           | 54.7          | 76.1          | 86.4          | 28.0           |

|            |       |      |       |      |       |       |       |      |       |       |      |
|------------|-------|------|-------|------|-------|-------|-------|------|-------|-------|------|
| <b>Glu</b> | 97.0  | 76.5 | 84.3  | 4.4  | -6.5  | -10.8 | 86.0  | 69.0 | 86.2  | 102.7 | 29.2 |
| <b>His</b> | 94.1  | 86.3 | 120.4 | -4.1 | -8.2  | 9.9   | 100.3 | 83.3 | 91.9  | 125.6 | 38.7 |
| <b>Ser</b> | 68.5  | 50.3 | 61.0  | 3.0  | 0.1   | -4.5  | 59.9  | 48.3 | 62.5  | 69.0  | 18.4 |
| <b>Thr</b> | 79.9  | 60.5 | 76.5  | 2.2  | -1.7  | -4.0  | 72.3  | 59.4 | 76.2  | 81.3  | 19.9 |
| <b>Tyr</b> | 164.7 | 90.4 | 128.5 | 2.7  | -13.0 | 11.1  | 127.8 | 86.9 | 127.7 | 168.9 | 71.0 |

Table S44: dipeptides molecular polarizabilities obtained using the database. Values in atomic units.

|                | $\alpha_{xx}$ | $\alpha_{yy}$ | $\alpha_{zz}$ | $\alpha_{xy}$ | $\alpha_{xz}$ | $\alpha_{yz}$ | $\alpha_{iso}$ | $\alpha_{11}$ | $\alpha_{22}$ | $\alpha_{33}$ | $\Delta\alpha$ |
|----------------|---------------|---------------|---------------|---------------|---------------|---------------|----------------|---------------|---------------|---------------|----------------|
| <b>Ala-Ala</b> | 107.4         | 104.0         | 101.7         | -13.1         | 2.2           | -5.4          | 104.3          | 91.7          | 101.0         | 120.3         | 25.3           |
| <b>Asp-Asp</b> | 164.8         | 116.2         | 142.1         | 6.0           | 14.4          | -3.9          | 141.0          | 114.1         | 136.9         | 172.0         | 50.5           |
| <b>Glu-Glu</b> | 181.1         | 148.0         | 172.1         | 0.4           | 4.8           | -9.2          | 167.1          | 144.8         | 172.8         | 183.5         | 34.6           |
| <b>His-His</b> | 196.6         | 171.2         | 212.5         | -2.6          | -6.8          | -24.2         | 193.4          | 159.3         | 196.4         | 224.6         | 56.7           |
| <b>Ser-Ser</b> | 126.5         | 99.9          | 118.6         | -2.0          | 18.6          | -5.2          | 115.0          | 97.9          | 104.9         | 142.1         | 41.2           |
| <b>Thr-Thr</b> | 156.3         | 112.1         | 145.2         | 4.8           | 12.4          | -4.1          | 137.9          | 110.7         | 138.6         | 164.4         | 46.5           |
| <b>Tyr-Tyr</b> | 283.2         | 208.1         | 257.2         | -18.8         | 45.0          | 11.8          | 249.5          | 193.3         | 237.6         | 317.7         | 109.2          |
| <b>Gly-Gly</b> | 102.0         | 54.8          | 84.7          | -3.4          | 16.1          | 1.1           | 80.5           | 54.4          | 75.4          | 111.7         | 50.2           |

Table S45: dipeptides molecular polarizabilities obtained by quantum calculations (M06-HF /aug-cc-pVDZ). Values in atomic units.

|                | $\alpha_{xx}$ | $\alpha_{yy}$ | $\alpha_{zz}$ | $\alpha_{xy}$ | $\alpha_{xz}$ | $\alpha_{yz}$ | $\alpha_{iso}$ | $\alpha_{11}$ | $\alpha_{22}$ | $\alpha_{33}$ | $\Delta\alpha$ |
|----------------|---------------|---------------|---------------|---------------|---------------|---------------|----------------|---------------|---------------|---------------|----------------|
| <b>Ala-Ala</b> | 102.9         | 95.0          | 103.4         | -2.2          | 6.0           | -2.5          | 100.5          | 94.3          | 97.2          | 109.9         | 14.3           |
| <b>Asp-Asp</b> | 150.5         | 111.0         | 154.6         | 3.5           | 10.8          | -10.4         | 138.7          | 107.8         | 144.1         | 164.2         | 49.5           |
| <b>Glu-Glu</b> | 170.0         | 142.8         | 185.0         | 3.3           | 0.7           | -18.9         | 165.9          | 135.3         | 170.3         | 192.2         | 49.7           |
| <b>His-His</b> | 185.8         | 158.0         | 228.7         | 0.9           | -9.2          | -14.1         | 190.8          | 155.2         | 184.0         | 233.2         | 68.3           |
| <b>Ser-Ser</b> | 119.2         | 93.3          | 123.7         | -1.0          | 16.0          | -8.0          | 112.1          | 91.0          | 106.7         | 138.6         | 42.0           |
| <b>Thr-Thr</b> | 143.7         | 112.2         | 155.2         | 2.7           | 10.8          | -9.2          | 137.0          | 109.6         | 138.9         | 162.6         | 46.0           |
| <b>Tyr-Tyr</b> | 259.5         | 198.9         | 272.3         | -17.4         | 32.7          | 4.7           | 243.6          | 191.8         | 239.1         | 299.8         | 93.7           |
| <b>Gly-Gly</b> | 101.2         | 56.9          | 83.2          | -3.2          | 13.8          | 0.2           | 80.4           | 56.7          | 75.9          | 108.8         | 45.7           |

Table S46: tripeptides molecular polarizabilities obtained using the database. Values in atomic units.

|                    | $\alpha_{xx}$ | $\alpha_{yy}$ | $\alpha_{zz}$ | $\alpha_{xy}$ | $\alpha_{xz}$ | $\alpha_{yz}$ | $\alpha_{iso}$ | $\alpha_{11}$ | $\alpha_{22}$ | $\alpha_{33}$ | $\Delta\alpha$ |
|--------------------|---------------|---------------|---------------|---------------|---------------|---------------|----------------|---------------|---------------|---------------|----------------|
| <b>Ala-Ala-Ala</b> | 181.1         | 118.2         | 157.5         | 9.6           | 23.9          | -8.7          | 152.3          | 112.9         | 147.8         | 196.1         | 72.4           |
| <b>Asp-Asp-Asp</b> | 237.9         | 185.0         | 198.9         | 7.4           | 33.4          | 5.6           | 207.3          | 179.4         | 184.1         | 258.3         | 76.6           |
| <b>Glu-Glu-Glu</b> | 280.6         | 203.4         | 255.0         | 3.8           | 10.9          | -15.8         | 246.4          | 198.5         | 255.9         | 284.7         | 76.1           |
| <b>His-His-His</b> | 307.1         | 254.5         | 296.0         | -28.7         | 17.6          | -4.1          | 285.9          | 241.6         | 286.7         | 329.3         | 75.9           |
| <b>Ser-Ser-Ser</b> | 193.6         | 142.2         | 168.9         | 2.8           | 22.6          | -8.5          | 168.2          | 137.8         | 159.8         | 207.1         | 61.3           |
| <b>Thr-Thr-Thr</b> | 229.1         | 168.0         | 210.8         | 0.1           | 19.4          | 0.6           | 202.6          | 167.9         | 198.6         | 241.4         | 63.9           |
| <b>Tyr-Tyr-Tyr</b> | 445.9         | 309.6         | 354.8         | 2.0           | 47.5          | 39.8          | 370.1          | 283.0         | 359.0         | 468.1         | 161.2          |
| <b>Gly-Gly-Gly</b> | 149.5         | 75.7          | 124.3         | -0.8          | 26.8          | 2.9           | 116.5          | 75.4          | 107.6         | 166.5         | 80.0           |

Table S47: tripeptides molecular polarizabilities obtained by quantum calculations (M06-HF /aug-cc-pVDZ). Values in atomic units.

|                    | $\alpha_{xx}$ | $\alpha_{yy}$ | $\alpha_{zz}$ | $\alpha_{xy}$ | $\alpha_{xz}$ | $\alpha_{yz}$ | $\alpha_{iso}$ | $\alpha_{11}$ | $\alpha_{22}$ | $\alpha_{33}$ | $\Delta\alpha$ |
|--------------------|---------------|---------------|---------------|---------------|---------------|---------------|----------------|---------------|---------------|---------------|----------------|
| <b>Ala-Ala-Ala</b> | 185.1         | 118.2         | 161.1         | 6.4           | 27.8          | -8.4          | 154.8          | 114.3         | 146.7         | 203.4         | 78.1           |
| <b>Asp-Asp-Asp</b> | 229.3         | 178.7         | 204.0         | -0.2          | 27.1          | 1.0           | 204.0          | 178.6         | 186.8         | 246.6         | 64.3           |
| <b>Glu-Glu-Glu</b> | 275.7         | 199.5         | 264.5         | 12.3          | -1.7          | -21.3         | 246.6          | 191.6         | 268.1         | 280.0         | 83.1           |
| <b>His-His-His</b> | 307.2         | 237.9         | 313.0         | -20.2         | 3.9           | -0.7          | 286.0          | 232.4         | 308.9         | 316.8         | 80.7           |
| <b>Ser-Ser-Ser</b> | 186.3         | 139.9         | 170.3         | 6.1           | 22.8          | -8.5          | 165.5          | 134.4         | 159.7         | 202.5         | 59.6           |
| <b>Thr-Thr-Thr</b> | 235.6         | 164.9         | 213.2         | 3.3           | 21.5          | -9.3          | 204.6          | 162.3         | 202.6         | 248.7         | 74.9           |
| <b>Tyr-Tyr-Tyr</b> | 448.4         | 278.0         | 367.6         | -2.0          | 45.4          | 21.0          | 364.7          | 272.5         | 352.5         | 469.1         | 171.2          |
| <b>Gly-Gly-Gly</b> | 147.7         | 79.2          | 124.3         | -0.8          | 25.8          | 0.8           | 117.1          | 79.2          | 107.8         | 164.4         | 75.1           |

Table S48: polypeptides molecular polarizabilities obtained using the database. Values in atomic units.

|          | $\alpha_{xx}$ | $\alpha_{yy}$ | $\alpha_{zz}$ | $\alpha_{xy}$ | $\alpha_{xz}$ | $\alpha_{yz}$ | $\alpha_{iso}$ | $\alpha_{11}$ | $\alpha_{22}$ | $\alpha_{33}$ | $\Delta\alpha$ |
|----------|---------------|---------------|---------------|---------------|---------------|---------------|----------------|---------------|---------------|---------------|----------------|
| <b>1</b> | 281.8         | 345.6         | 246.2         | -43.2         | 29.3          | 0.4           | 291.2          | 225.2         | 279.7         | 368.8         | 125.6          |
| <b>2</b> | 378.6         | 336.5         | 336.1         | 13.6          | -33.0         | -24.7         | 350.4          | 307.8         | 338.2         | 405.1         | 86.2           |
| <b>3</b> | 466.4         | 368.1         | 413.8         | 8.9           | 39.1          | -0.2          | 416.1          | 366.9         | 393.7         | 487.7         | 109.9          |
| <b>4</b> | 341.6         | 326.4         | 373.8         | -19.6         | 52.2          | -9.0          | 347.3          | 298.7         | 326.8         | 416.4         | 106.5          |
| <b>5</b> | 480.7         | 354.6         | 425.5         | -13.1         | 56.7          | -23.8         | 420.3          | 347.2         | 394.0         | 519.7         | 154.4          |
| <b>6</b> | 346.0         | 233.8         | 328.8         | -2.1          | 36.4          | -6.4          | 302.9          | 233.4         | 300.2         | 375.0         | 122.7          |
| <b>7</b> | 411.9         | 371.2         | 437.0         | 0.8           | 55.7          | -2.8          | 406.7          | 366.2         | 372.3         | 481.6         | 112.5          |
| <b>8</b> | 687.6         | 622.8         | 598.7         | -32.7         | -3.8          | 13.0          | 636.4          | 591.7         | 615.5         | 701.9         | 100.4          |

Table S49: polypeptides molecular polarizabilities obtained by quantum calculations (M06-HF /aug-cc-pVDZ). Values in atomic units.

|          | $\alpha_{xx}$ | $\alpha_{yy}$ | $\alpha_{zz}$ | $\alpha_{xy}$ | $\alpha_{xz}$ | $\alpha_{yz}$ | $\alpha_{iso}$ | $\alpha_{11}$ | $\alpha_{22}$ | $\alpha_{33}$ | $\Delta\alpha$ |
|----------|---------------|---------------|---------------|---------------|---------------|---------------|----------------|---------------|---------------|---------------|----------------|
| <b>1</b> | 277.9         | 350.1         | 244.7         | -42.8         | 32.9          | -1.5          | 290.9          | 220.4         | 280.3         | 372.0         | 132.2          |
| <b>2</b> | 374.6         | 339.9         | 320.1         | 8.3           | -48.0         | -23.1         | 344.8          | 287.1         | 339.5         | 407.9         | 104.9          |
| <b>3</b> | 492.3         | 353.1         | 410.1         | 16.4          | 41.9          | -3.8          | 418.5          | 349.7         | 394.8         | 511.1         | 144.3          |
| <b>4</b> | 351.4         | 305.2         | 389.9         | -12.7         | 58.6          | -9.7          | 348.8          | 300.8         | 311.5         | 434.2         | 128.3          |
| <b>5</b> | 493.5         | 337.7         | 433.2         | -1.8          | 61.0          | -43.3         | 421.5          | 318.3         | 411.6         | 534.6         | 187.9          |
| <b>6</b> | 354.0         | 230.3         | 329.4         | 7.1           | 40.3          | -10.8         | 304.6          | 228.0         | 301.8         | 383.9         | 135.1          |
| <b>7</b> | 410.8         | 351.7         | 446.9         | 11.6          | 60.0          | -15.0         | 403.1          | 339.2         | 378.5         | 491.7         | 137.1          |
| <b>8</b> | 740.1         | 612.7         | 563.1         | -50.3         | -18.3         | 17.8          | 638.6          | 557.3         | 598.2         | 760.3         | 185.9          |

## 4. Molecular Dynamics

Table S50: glycine molecular polarizabilities (au) and dipole moments (au) obtained after molecular dynamics.

| <b>Time(ps)</b> | $\mu_x$ | $\mu_y$ | $\mu_z$ | $\alpha_{xx}$ | $\alpha_{yy}$ | $\alpha_{zz}$ | $\alpha_{xy}$ | $\alpha_{xz}$ | $\alpha_{yz}$ |
|-----------------|---------|---------|---------|---------------|---------------|---------------|---------------|---------------|---------------|
| <b>0</b>        | -5.40   | -1.94   | -2.55   | 48.5          | 50.6          | 35.7          | 2.3           | 4.7           | 1.9           |

|            |       |       |       |      |      |      |      |      |      |
|------------|-------|-------|-------|------|------|------|------|------|------|
| <b>20</b>  | 3.76  | -2.83 | 4.42  | 44.5 | 42.9 | 47.2 | 0.4  | 3.7  | -6.9 |
| <b>40</b>  | 3.39  | 1.66  | 5.21  | 42.2 | 45.8 | 46.1 | -2.6 | 8.1  | 2.2  |
| <b>60</b>  | -3.87 | -5.25 | 2.15  | 48.4 | 43.5 | 43.3 | 0.3  | 3.5  | -6.4 |
| <b>80</b>  | -1.89 | -5.24 | 0.51  | 40.1 | 48.6 | 46.6 | 0.3  | -4.6 | 2.8  |
| <b>100</b> | 1.32  | -5.40 | -3.27 | 53.6 | 39.6 | 44.6 | -1.3 | 5.7  | 5.3  |
| <b>120</b> | 5.63  | -2.64 | 0.17  | 51.1 | 37.4 | 47.9 | -4.9 | -4.1 | -4.0 |
| <b>140</b> | -5.95 | 0.23  | 2.90  | 49.8 | 32.3 | 54.6 | -1.9 | -3.1 | 0.7  |
| <b>160</b> | -2.50 | -5.19 | 0.52  | 46.3 | 49.5 | 37.4 | -2.3 | 0.9  | -6.2 |
| <b>180</b> | 3.78  | -4.70 | 0.94  | 49.2 | 47.6 | 36.6 | 0.0  | 1.7  | -0.2 |
| <b>200</b> | 4.47  | -4.14 | 1.05  | 40.8 | 44.4 | 49.6 | -3.8 | -5.9 | -6.8 |
| <b>220</b> | -3.03 | -5.25 | 2.36  | 41.2 | 46.2 | 47.6 | 0.4  | -8.5 | 1.6  |
| <b>240</b> | -1.68 | 5.25  | 2.75  | 36.4 | 49.5 | 49.1 | -4.6 | 3.1  | 1.0  |
| <b>260</b> | -2.09 | 4.04  | 4.01  | 44.9 | 39.1 | 49.5 | -6.0 | 3.0  | 3.7  |
| <b>280</b> | 3.15  | 5.06  | 0.01  | 36.6 | 46.5 | 51.5 | 7.0  | -0.4 | -2.2 |
| <b>300</b> | -2.08 | 5.98  | -0.09 | 34.5 | 48.9 | 53.3 | -2.8 | -2.7 | 1.6  |
| <b>320</b> | 0.80  | 5.91  | -2.92 | 46.2 | 46.2 | 41.2 | -2.9 | -4.4 | -5.3 |
| <b>340</b> | -5.24 | 1.65  | -1.97 | 44.7 | 45.3 | 44.2 | -5.7 | 1.5  | 5.1  |
| <b>360</b> | -2.36 | -0.80 | -5.95 | 41.7 | 43.0 | 48.7 | 6.5  | 3.7  | -3.3 |
| <b>380</b> | -1.90 | -5.79 | -1.43 | 37.7 | 48.0 | 50.5 | 3.1  | 5.0  | -4.8 |
| <b>400</b> | -5.40 | -1.94 | -2.55 | 48.5 | 50.6 | 35.7 | 2.3  | 4.7  | 1.9  |
